# Supplementary material for: An ultrasensitive multimodal intracranial pressure biotelemetric system enabled by exceptional point and iontronics
Source: PubMed Central journal article supplement — Nat Commun. 2024 Nov 5;15:9557. doi: 10.1038/s41467-024-53836-8 (PMC11538422; doi:10.1038/s41467-024-53836-8), 2024-11-05
Supplement: 41467_2024_53836_MOESM1_ESM.pdf [file 41467_2024_53836_MOESM1_ESM.pdf]

# An ultrasensitive multimodal intracranial pressure biotelemetric system enabled by exceptional point and iontronics

## Supplementary Material

### SM Note 1: Eigenfrequencies of a standard second-order PT-symmetric oscillator with asymmetric capacitive perturbations

Considering the circuit diagram shown in Fig. S1a, which is formed by an active oscillator as the reader ( $-R_1, L_1, C_1$ ) and a passive oscillator as the sensor ( $R_2, L_2, C_2$ ), one can apply Kirchhoff's laws to such an electronic circuit and write the circuit dynamics as

$$\begin{cases} i\omega(L_1 I_1 + M_{12} I_2) - I_1 R_1 + \frac{I_1}{i\omega C_1} = 0 \\ i\omega(L_2 I_2 + M_{21} I_1) + I_2 R_2 + \frac{I_2}{i\omega C_2} = 0 \end{cases}, \quad (1)$$

where  $I_1$  and  $I_2$  are the currents of the reader and sensor, respectively. We can then recast the above equation to the following matrix form as

$$\begin{pmatrix} i\omega L_1 - R_1 + \frac{1}{i\omega C_1} & i\omega M_{12} \\ i\omega M_{21} & i\omega L_2 + R_2 + \frac{1}{i\omega C_2} \end{pmatrix} \begin{pmatrix} I_1 \\ I_2 \end{pmatrix} = 0, \quad (2)$$

which can be then simplified to

$$\begin{pmatrix} i - \frac{\omega_1}{\omega} \frac{1}{\gamma_1} - i \frac{\omega_1^2}{\omega^2} & i\mu_{12} \\ i\mu_{12} & i + \frac{\omega_2}{\omega} \frac{1}{\gamma_2} - i \frac{\omega_2^2}{\omega^2} \end{pmatrix} \begin{pmatrix} I_1 \\ I_2 \end{pmatrix} = 0. \quad (3)$$

Here  $\gamma_{1,2} = R_{1,2}^{-1} \sqrt{L_{1,2} / C_{1,2}}$  is the non-Hermiticity parameter of this non-Hermitian system,  $\mu_{12,21} = M_{12,21} / \sqrt{L_1 L_2}$  denotes the inductive coupling strength and  $M_{12,21}$  is the mutual inductance between two coils.

In the weak coupling regime, the equation can be described approximately by the temporal coupled-mode equations<sup>1</sup> with  $I_{1,2} = I_n^0 e^{-i\omega t}$ . By making the approximation<sup>2</sup> of  $\mu_{12,21} \ll 1$  and  $1 - \frac{\omega_0^2}{\omega^2} \approx \frac{2(\omega - \omega_0)}{\omega_0}$ , we have

20 
$$H_0 \mathbf{I}_n^0 = \omega_n^0 \mathbf{I}_n^0, \quad (4)$$

21 and the two-level PT-symmetric Hamiltonian can be written as

22 
$$H_0 = \begin{pmatrix} 1 - i \frac{1}{2\gamma_1} & -\frac{\mu_{12}}{2} \\ -\frac{\mu_{21}}{2} & 1 + i \frac{1}{2\gamma_2} \end{pmatrix}. \quad (5)$$

23 Thus, its normalized eigenfrequencies can be expressed as

24 
$$\omega_{1,2} = 1 + i \left( \frac{1}{4\gamma_2} - \frac{1}{4\gamma_1} \right) \pm \frac{1}{4\gamma_1\gamma_2} \sqrt{4\mu_{12}\mu_{21}\gamma_1^2\gamma_2^2 - (\gamma_1 + \gamma_2)^2}. \quad (6)$$

25 The PT symmetry condition requires that  $[PT, H_0] \equiv PT H_0 - H_0 PT = 0$ , leading to  $\gamma_1 = \gamma_2 = \gamma$  and  
 26  $\mu_{12} = \mu_{21} = \mu$ ; here,  $P$  denotes the parity operator associated with the first Pauli matrix and  $T$  is the time-reversal  
 27 operator which takes the complex conjugation. Then, the eigenfrequencies in the unit of the resonance frequency  
 28 ( $\omega_0 = 1/\sqrt{LC}$ ) yield

29 
$$\omega_{1,2} = 1 \pm \frac{1}{2\gamma} \sqrt{\mu^2 \gamma^2 - 1}. \quad (7)$$

30 The exact solution of eigenfrequencies in the PT-symmetric electronic system, as a function of  $\gamma$  and the coupling  
 31 strength  $\mu$ , has been given by ref. <sup>3</sup>, and has the form of

32 
$$\omega_{1,2} = \pm \sqrt{\frac{2\gamma^2 - 1 \pm \sqrt{1 - 4\gamma^2 + 4\gamma^4 \mu^2}}{2\gamma^2 (1 - \mu^2)}}. \quad (8)$$

33 Figure S2 demonstrates that the exact solution and the approximation of eigenfrequencies can have a perfect  
 34 agreement with each other when  $\mu < 0.1$ .

35 Considering the tiny capacitance variation ( $C_2' = C_2 + \Delta C$ ) introduced to the sensor end only, the equation can be  
 36 rewritten as

37 
$$\begin{cases} i\omega(L_1 I_1 + M_{21} I_2) - I_1 R_1 + \frac{I_1}{i\omega C_1} = 0 \\ i\omega(L_2 I_2 + M_{12} I_1) + I_2 R_2 + \frac{I_2}{i\omega(C_2 + \Delta C)} = 0 \end{cases}. \quad (9)$$

38 Defining  $\delta = \Delta C / C \ll 1$ , the equation is given by

$$39 \begin{pmatrix} i - \frac{\omega_0}{\omega} \frac{1}{\gamma} - i \frac{\omega_0^2}{\omega^2} & i\mu \\ i\mu & i + \frac{\omega_0}{\omega} \frac{1}{\gamma} - i \frac{\omega_0^2}{\omega^2} \frac{1}{1+\delta} \end{pmatrix} \begin{pmatrix} I_1 \\ I_2 \end{pmatrix} = 0. \quad (10)$$

40 We make the approximation  $\frac{1}{1+\delta} \approx 1 - \delta$ , the effective Hamiltonian  $H'$  is obtained

$$41 H' = \begin{pmatrix} 1 - i \frac{1}{2\gamma} & -\frac{\mu}{2} \\ -\frac{\mu}{2} & 1 - \frac{\delta}{2} + i \frac{1}{2\gamma} \end{pmatrix}. \quad (11)$$

42 The solution of the normalized eigenfrequency can be obtained as follows

$$43 \omega'_{1,2} = 1 - \frac{\delta}{4} \pm \frac{1}{4\gamma} \sqrt{(\delta^2 + 4\mu^2)\gamma^2 - 4i\delta\gamma - 4}. \quad (12)$$

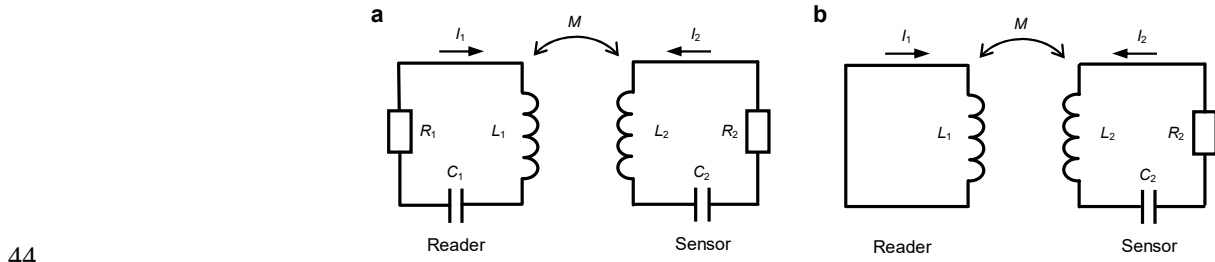

**FIG. S1.** The equivalent circuit diagram of (a) the PT-symmetric system and (b) the conventional “LC” wireless system.

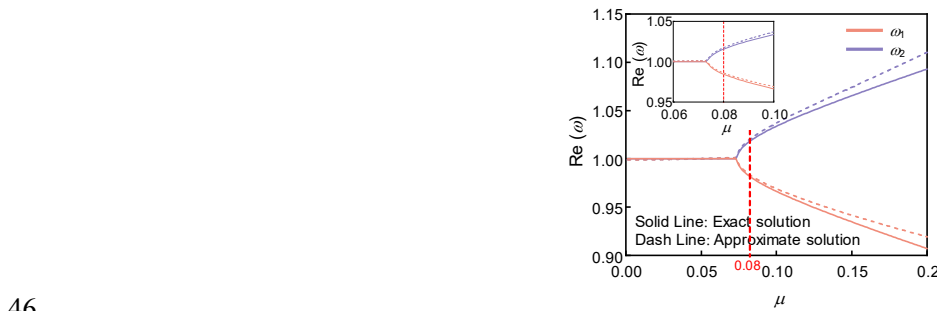

**Fig. S2.** The exact and approximate solutions of the real part  $\text{Re}(\omega)$  of the eigenvalues as a function of the coupling coefficient

49 **SM Note 2: Eigenfrequencies of a conventional “LC” system**

50 Considering the circuit diagram shown in Fig. S1b above, which is formed by a reader ( $L_1$ ) and a sensor  
 51 ( $L_2, C_2, R_2$ ). One can apply Kirchoff’s laws to such an electronic circuit and write the circuit dynamics as

$$52 \quad \begin{cases} i\omega(L_1 I_1 + M_{12} I_2) = 0 \\ i\omega(L_2 I_2 + M_{21} I_1) + I_2 R_2 + \frac{I_2}{i\omega C_2} = 0 \end{cases} \quad (13)$$

53 Thus, its eigenfrequencies for conventional LC system can be expressed as

$$54 \quad \omega_{LC1,2} = \frac{i(C_2 R_2 \pm \sqrt{C_2^2 R_2^2 + 4L_2 C_2 \mu^2 - 4L_1 C_2})}{C_2(L_1 - L_2 \mu^2)}. \quad (14)$$

55 Substituting  $L_1 = L_2$ ,  $\mu = M_{12,21} / \sqrt{L_1 L_2} = M / L$ ,  $\gamma_2 = R_2^{-1} \sqrt{L_2 / C_2}$  to make fair comparison with the EP system, the  
 56 solution of the normalized eigenfrequencies can be obtained as follow

$$57 \quad \omega_{LC1,2} = \frac{1}{2\gamma(1-\mu^2)} (i \pm \sqrt{4\gamma^2(1-\mu^2) - 1}). \quad (15)$$

58 Considering the tiny capacitance variation introduced to the sensor end only, the eigenfrequencies can be rewritten as

$$59 \quad \omega_{LC1,2}' = \frac{1}{2\gamma\sqrt{1+\delta}(1-\mu^2)} (i \pm \sqrt{4\gamma^2(1+\delta)(1-\mu^2) - 1}). \quad (16)$$

60

61 **SM Note 3: The enlarged cross-sectional view of microstructures obtained by SEM**

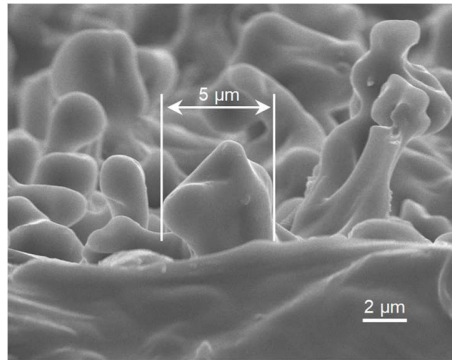

62

63 **FIG. S3.** The enlarged cross-sectional SEM image of a PVA/H<sub>3</sub>PO<sub>4</sub> film. Similar result can be repeated for at least five times.

64

65

66 **SM Note 4: Voltage divider circuit for response time measurement**

67 To determine the response times of the transducer, we construct a voltage divider circuit and utilized a high-speed  
68 oscilloscope for precise measurements. As depicted in Fig. S4, a 24 MHz AC signal is generated and applied to the  
69 transducer via a signal generator, while pressure is exerted on the transducer by a dynamometer. It converts the  
70 capacitance change into voltage variations. Due to its exceptionally high sampling rate (maximum 16 GSa/s), high-  
71 speed oscilloscopes are capable of easily capturing voltage fluctuations derived from the transducer.

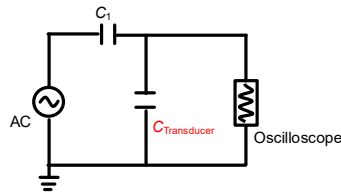

72  
73 **FIG. S4.** The Schematic of the voltage divider circuit.  
74  
75

76 **SM Note 5: Responses of the transducer against the pressure variations**

77 External perturbations to the PT-symmetric systems typically induce asymmetry predominantly on the sensor side.  
 78 For optimal sensing, the PT-symmetric system is generally tuned to the exact phase. Variations within the sensor  
 79 introduce asymmetry, causing the system to deviate from its PT-symmetric state and resulting in a detectable frequency  
 80 shift. The implementation of this method is straightforward and robust to external variations.

81 An iontronic pressure transducer is employed in the EP-based biotelemetric system for the wireless monitoring of  
 82 ICP, and it can be treated as a parallel connection of capacitance ( $C_p$ ) and resistance ( $R_p$ ). The relationship between the  
 83 capacitance and resistance of the iontronic transducer as a function of pressure can be found in Fig. S5a; it exhibits a  
 84 large impedance variation. The real part of impedance can be written as  $\text{Re}(Z_{in}) = \frac{R_p}{1 + (\omega R_p C_p)^2}$ . However, when the  
 85 iontronic pressure transducer is connected in parallel with a capacitor ( $C_2 = 20$  pF), the resultant equivalent impedance  
 86 is nearly negligible as depicted in Fig. S5b. This configuration significantly diminishes the impact of resistance  
 87 variations on the impedance. Fig. S5c examines the influence of parallel capacitance on the frequency offset within the  
 88 system, clearly demonstrating that the effects of the resistance are substantially reduced. As evidenced in Fig. S5d, it  
 89 has negligible effects on frequency offset in comparison to the capacitance effects. Consequently, the iontronic pressure  
 90 transducer is predominantly characterized as a capacitive element when its resistance is disregarded through the parallel  
 91 connection of a capacitor.

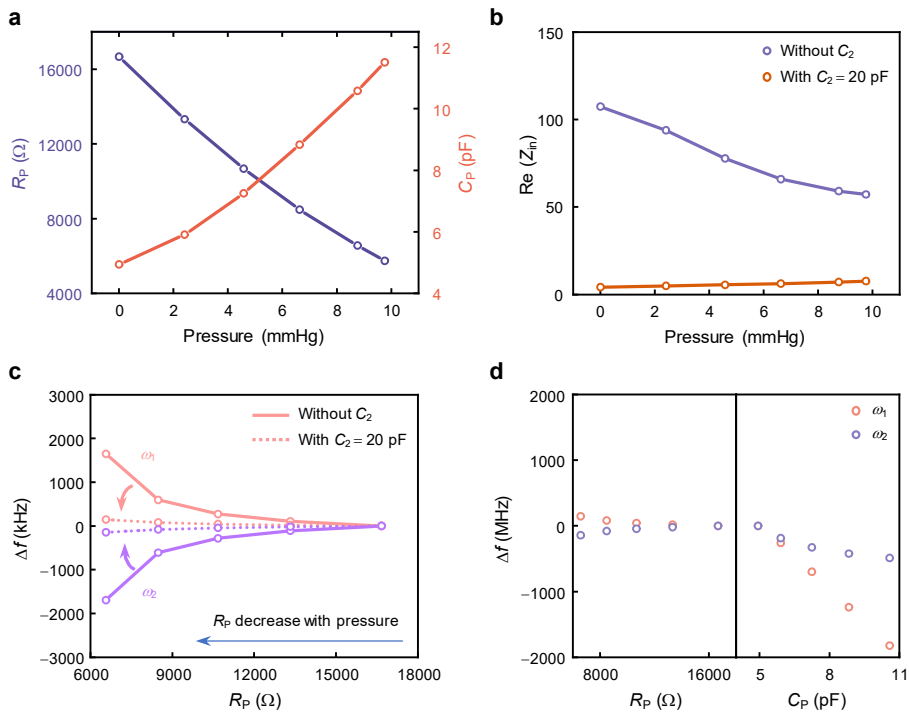

93 **FIG. S5.** (a) Resistance and capacitance of the iontronic transducer as a function of applied pressure. (b) The real part of the  
94 impedance  $\text{Re}(Z_{in})$  change for the ICP transducer with/without  $C_2 = 20$  pF . (c) Dependency of the system frequency offset on  
95 the transducer's resistance. (d) With a parallel 20pF capacitor, system frequency offset as a function of the transducer's resistance  
96 and capacitance, respectively.

97



98 **SM Note 6: A summary of state-of-the-art pressure monitoring systems**

99 Table S1. Pressure monitoring systems performance summary

| Measuring range | Size (mm) | Operating frequency | Pressure sensitivity | Resolution | Ref       |
|-----------------|-----------|---------------------|----------------------|------------|-----------|
| 0 – 100         | 2.5 × 2.5 | ~5 GHz              | ~1.084 MHz/mmHg      | 0.2 mmHg   | 4         |
| 5 – 50          | 10 × 10   | 4.1 GHz             | 2.64 MHz/mmHg        | ...        | 5         |
| 5 – 50          | 14 × 14   | ~3.8 GHz            | 1.28 MHz/mmHg        | ...        | 6         |
| 0 – 30          | 8 × 8     | ~260 MHz            | ~200 kHz/mmHg        | 1 mmHg     | 7         |
| 0 – 120         | 60 × 70   | ~13.56 MHz          | 160 Hz/mmHg          | ...        | 8         |
| 0 – 40          | 5 × 5     | 35 MHz ~ 2.7 GHz    | 0.92 MHz/mmHg        | 0.028 mmHg | 9         |
| 0 – 10          | 10 × 10   | 24 MHz              | 115.95 kHz/mmHg      | 0.003 mmHg | This work |

100

101

## 102 SM Note 7: Detail analysis of noise

103 The exceptional point (EP)-based sensors do enhance the sensitivity but provide no fundamental signal-to-noise  
104 ratio (SNR) enhancement<sup>10</sup>. That is said, while the system has enhanced responsivity towards the target perturbations  
105 around EP, any unwanted noise existing in the system will also be amplified in the same magnitude. Therefore, to  
106 benefit from the sensitivity enhancement brought by the EP, any unwanted noise of the sensing system should be  
107 suppressed to be sufficiently small compared to the target perturbation.

108 Generally, there are several noise sources in electromagnetic systems, such as shot noise, flicker noise, thermal  
109 noise, and quantum noise. Particularly, quantum noise originated from the quantization nature of charged carriers and  
110 photons is significant in optical and photonic systems<sup>11</sup>, but can be ignored in our radio-frequency EP sensing system.  
111 Shot noise and flicker ( $1/f$  noise) exist in solid-state devices and vacuum electronics, which are important only at  
112 low frequencies (i.e., 1 Hz to 1 MHz). Consequently, thermal noise (Johnson-Nyquist noise<sup>12</sup>) sourced from the thermal  
113 agitation of bounded charges in devices (especially in resistors), which simultaneously introduces the resonance  
114 frequency shifts, is considered the dominant noise source in this work.

115 According to the Planck's black body radiation law, electrons in a real-world resistor are in random motion, whose  
116 kinetic energy may produce small, random voltage fluctuations across this resistor with a zero average but a nonzero  
117 root mean square (RMS) value, which can be expressed as

$$118 \quad \bar{V}_{\text{noise}} = \sqrt{\frac{4hfBR}{e^{hf/kT} - 1}}, \quad (17)$$

119 where  $h$  denotes the Planck's constant,  $k$  is the Boltzmann's constant,  $T$  represents the temperature in kelvin,  $f(B)$   
120 is the center frequency (bandwidth), and  $R$  is the resistance value. In the low frequency range where the approximation  
121  $hf \ll kT$  takes account, the above equation can be simplified to  $\bar{V}_{\text{noise}} = \sqrt{4kTBR}$ . This indicates that the noise  
122 voltage fluctuates between  $\pm\sqrt{8kTBR}$ . Therefore, the voltage across a non-ideal resistor can be decomposed into  
123  $V' = V_R + V_{\text{noise}}$ , as seen in Fig. S6a. This model can also be equivalent to the series connection of an ideal resistor ( $R$ )  
124 and a noisy resistor ( $R'$ ), as seen in Fig. S6b, such that  $V' = I(R + R') = IR + IR' = V_R + V_{\text{noise}}$ . Defining a time-  
125 fluctuating parameter  $\varepsilon_{1,2} = R'/R$  where the subscript 1,2 denotes the deviation occurring to the resistors of the gain  
126 or loss oscillator, we can analyze the resonance frequency fluctuations due to thermal noise. Here, to simplify our  
127 analysis, we assume  $\varepsilon_{1,2} \in [-\Delta, \Delta]$  where  $\Delta \propto \sqrt{8kTB/R}$ .

128 In experiments, the measurement of eigenfrequencies associated with the Hamiltonians is realized by tracking the  
129 dips of reflection spectra, which, in this work, is the reflection coefficient ( $S_{11}$ ) at the gain side (Fig. S6c). The noise-

130 deviated  $S_{11}$ , considering the maximum noise ( $\varepsilon_{1,2} \equiv \Delta$ ), has the form of

$$131 \quad S_{11} = \frac{\eta(1+\Delta)^2 \omega^2 + \eta\gamma^2[1-2\omega^2 - (\mu^2-1)\omega^4]}{[(1+\Delta)(\eta+\Delta\eta) - 2\omega^2] - 2i\gamma\omega(\omega^2-1) + \eta\gamma^2[1-2\omega^2 - (\mu^2-1)\omega^4]}, \quad (18)$$

132 which yields the maximized deviated resonance frequency to be

$$133 \quad \omega_{1,2}' = \sqrt{\frac{(1+\Delta)^2 - 2\gamma^2 \pm \sqrt{(1+\Delta)^4 - 4\gamma^2(1+\Delta)^2 + 4\gamma^4\mu^2}}{2\gamma^2(\mu^2-1)}}. \quad (19)$$

134 The frequency fluctuation caused by the noise is  $\Delta\omega = \omega_{1,2} - \omega_{1,2}'$ . Taking parameters used in our experiments (e.g.,  
 135  $\gamma = 13.56$ ,  $\mu = 0.08$  and the system operates at  $f_0 \approx 24.1$  MHz and  $T = 290$  K), the above equation yields  
 136  $\Delta f = \Delta\omega / 2\pi \approx 1$  kHz, which agrees well with our noise measurements in Fig. S6d that the measured frequency may  
 137 have  $\pm 2.5$  kHz fluctuation. This noise-introduced frequency fluctuation is indeed ignorable compared to the  
 138 frequency shift caused by the target pressure variations ( $\sim 10 - \sim 400$  kHz), which, therefore, does not negate the  
 139 implementation of the EP for sensing.

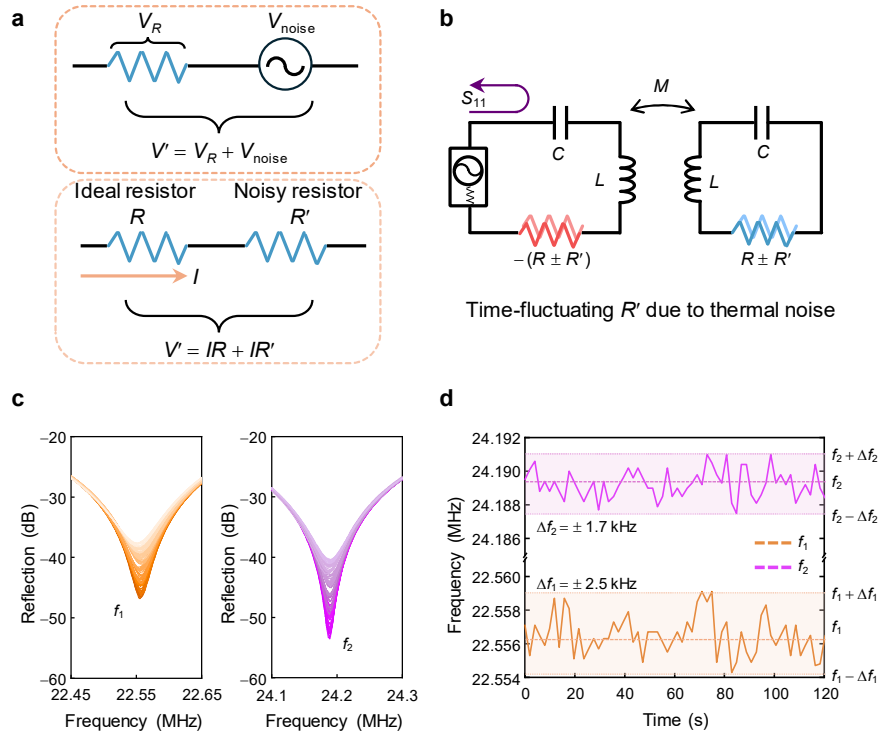

140  
 141 **Fig. S6.** (a) Circuit equivalent of a non-ideal resistor. (b) Circuit diagram of the EP sensing system considering the presence of  
 142 thermal noise. (c) Reflection spectra measured within 120 seconds ( $\sim$  per 2 seconds) without perturbations applied. (d) Frequency  
 143 fluctuations caused by the noise.

144 **SM Note 8: Comparison of sensing distance between PT symmetry system and conventional “LC” wireless**  
145 **sensing**

146 The relationship between the wireless coupling distance of two coils and the coupling coefficient is illustrated in Fig.  
147 S7a. Figures. S7b and S7c present a comparative analysis of the reflection spectra between the PT-symmetric system  
148 and the conventional wireless “LC” system versus coupling distance. The PT-symmetric system is characterized by its  
149 sharply defined resonance peaks with substantial amplitudes, crucial for detecting minute physiological variations. Its  
150 ability to maintain sharp resonances, even with varying coupling coefficients, underscores its robust stability and  
151 superior precision monitoring capabilities. In the PT-exact phase, the system achieves maximum resolution. As the  
152 coupling distance increases ( $\mu$  decreases), the system transitions from the exact state to the broken state, during which  
153 the two eigenfrequencies converge and the amplitude of the reflection peak progressively diminishes. The degree, to  
154 which these peaks are pronounced, correlates with the system’s potential for exceptional sensitivity and accuracy in  
155 detecting the changes it is tuned to monitor.

156 The resonant frequency obtained from the reflection spectrum (red point in Fig. S7c) is written as:  
157  $\omega_c = \sqrt{1/[(1-\mu^2)L_2C_2]}$ . It is worth noting that the intensity of conventional “LC” system reflectance spectra decreases  
158 sharply with increasing coupling distance, making it difficult to observe at the detection distance of ICP. The  
159 conventional wireless “LC” systems show disappointing resolution, with significantly low  $S_{11}$  amplitude and gradually  
160 disappear as the coupling coefficient decreases. This decreased resolution in the conventional “LC” system is a result  
161 of its inherent energy dissipation characteristics, which lead to broader spectral responses and thus a reduced ability to  
162 precisely pinpoint specific resonant frequencies. This means that at the detection distance of the ICP, it is not able to  
163 fulfill the requirement of discerning small variations in monitored parameters—such as intracranial pressure.

164 The PT-symmetric system’s superior detection and response capabilities render it highly effective for monitoring  
165 applications, particularly in biotelemetry, where precise detection of small physiological changes is paramount. The  
166 pronounced difference in the resonance peak sharpness between the PT-symmetric and convention LC systems  
167 highlights the former’s superior performance, underscoring its potential for groundbreaking advancements in non-  
168 invasive medical monitoring technologies.

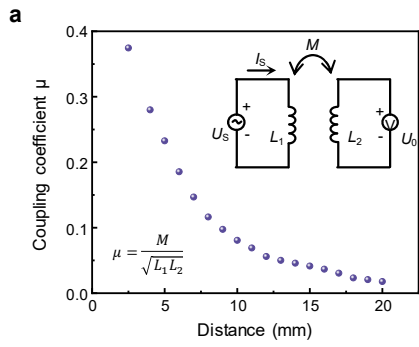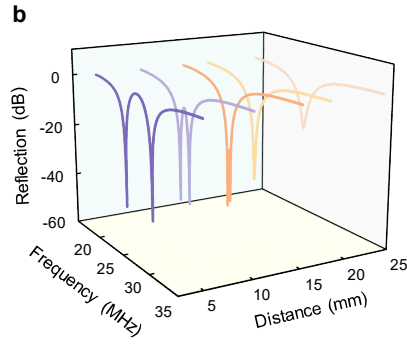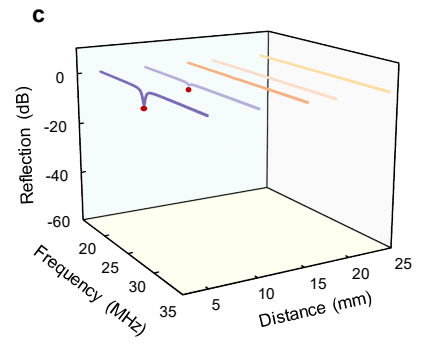

169

170 **FIG. S7.** (a) Coupling coefficient as a function of the wireless coupling distance of the two coils. (b) Magnitude of the reflection  
 171 coefficient for the (b) PT-symmetric system and (c) conventional “LC” wireless system, under varying coupling distance.

172

173 **SM Note 9: Photograph of the sensor**

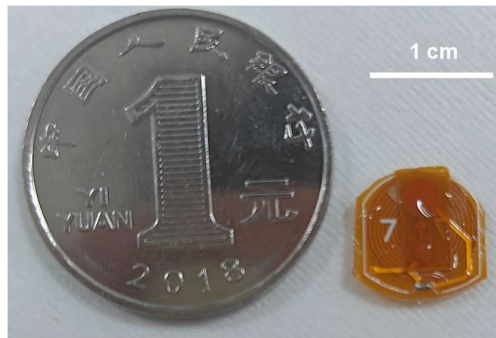

174

175

176

177

**FIG. S8.** Photograph of the sensor.

178 **SM Note 10: Frequency response of the sensor system under low pressure**

179 As mentioned in SM note 7, we have both theoretically and experimentally demonstrated that the noise-induced  
180 frequency fluctuations are within  $\pm 2.5$  kHz, which can be ignored compared to the eigenfrequency shift caused by the  
181 target pressure variations. To demonstrate that the fluctuations in Fig. 5g in the main text are induced by the heartbeat  
182 signal instead of noise, we further perform experiments in the low-pressure range (0 - 0.15 mmHg) shown in Fig. S9.  
183 The results demonstrate that the noise-induced (no pressure applied) frequency fluctuations (marked in Fig. S9a and  
184 zoomed-in in Fig. S9b) are below 2 kHz, while the frequency fluctuations caused by the heartbeat signal is  
185  $\sim 25$  kHz (the grey area marked in Fig. S9a), which is more than one order of magnitude larger than the noise-induced  
186 fluctuation (Fig. S9b). In addition, the results in Fig. 4f, which demonstrates clear frequency differentiation under  
187 extremely weak pressure perturbations, further support this finding. Figure 5g shows that the frequency fluctuation  
188 caused by the heartbeat is about 25 kHz, significantly greater than that caused by noise. The fast Fourier transformation  
189 (FFT) analysis (Fig. S9c) of the ICP signal from Fig. 5f reveals two distinct peaks: one for breathing ( $\sim 0.33$  Hz) and  
190 another for heartbeat ( $\sim 3.76$  Hz), which closely matches the ECG results.

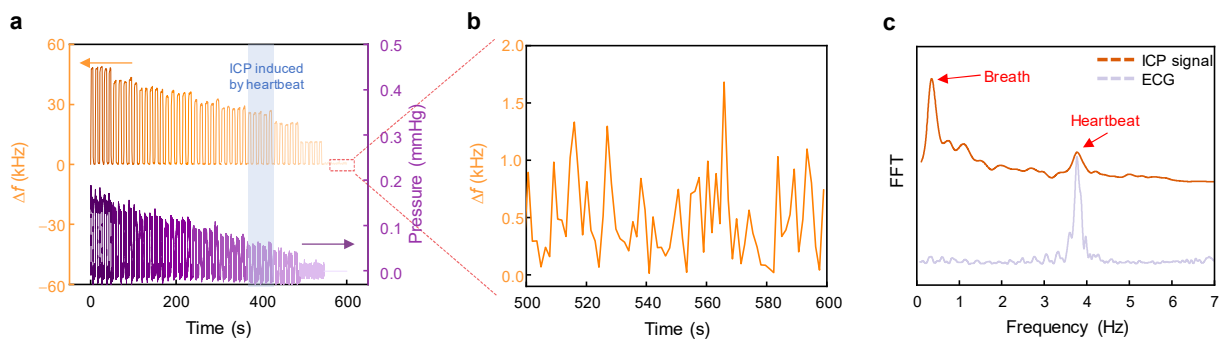

191 **Fig. S9.** (a) Frequency shift of  $\omega_2$  in response to low applied pressure ( $\sim$  per 60 seconds). (b) Enlarged view of frequency shift  
192 without applied pressure. (c) FFT analysis of ICP signal and ECG.

194

195 **Supplementary References**

- 196 1. Park, S., Lee, J. & Kim, S. Robust Wireless Power Transfer with Minimal Field Exposure Using Parity-Time  
197 Symmetric Microwave Cavities. *Phys. Rev. Appl.* **16**, 014022 (2021).
- 198 2. Zhou, B. Bin, Wang, L. F., Dong, L. & Huang, Q. A. Observation of the perturbed eigenvalues of PT-  
199 symmetric LC resonator systems. *J. Phys. Commun.* **5**, 045010 (2021).
- 200 3. Chen, P.-Y. *et al.* Generalized parity–time symmetry condition for enhanced sensor telemetry. *Nat. Electron.*  
201 **1**, 297–304 (2018).
- 202 4. Chen, L. Y. *et al.* Continuous wireless pressure monitoring and mapping with ultra-small passive sensors for  
203 health monitoring and critical care. *Nat. Commun.* **5**, 5028 (2014).
- 204 5. Kim, J. *et al.* Wearable smart sensor systems integrated on soft contact lenses for wireless ocular diagnostics.  
205 *Nat. Commun.* **8**, 14997 (2017).
- 206 6. Yang, C. *et al.* Intelligent wireless theranostic contact lens for electrical sensing and regulation of intraocular  
207 pressure. *Nat. Commun.* **13**, 2556 (2022).
- 208 7. Lu, D. *et al.* Bioresorbable Wireless Sensors as Temporary Implants for In Vivo Measurements of Pressure.  
209 *Adv. Funct. Mater.* **30**, 2003754 (2020).
- 210 8. Nikbakhtnasrabadi, F., Hosseini, E. S., Dervin, S., Shakthivel, D. & Dahiya, R. Smart Bandage with Inductor-  
211 Capacitor Resonant Tank Based Printed Wireless Pressure Sensor on Electrospun Poly-L-Lactide Nanofibers.  
212 *Adv. Electron. Mater.* **8**, 2101348 (2022).
- 213 9. Wang, F. *et al.* A Novel Intracranial Pressure Readout Circuit for Passive Wireless LC Sensor. *IEEE Trans.*  
214 *Biomed. Circuits Syst.* **11**, 1123–1132 (2017).
- 215 10. Loughlin, H. & Sudhir, V. Exceptional-Point Sensors Offer No Fundamental Signal-to-Noise Ratio  
216 Enhancement. *Phys. Rev. Lett.* **132**, 243601 (2024).
- 217 11. Xiao, Z., Li, H., Kottos, T. & Alù, A. Enhanced Sensing and Nondegraded Thermal Noise Performance Based  
218 on P T-Symmetric Electronic Circuits with a Sixth-Order Exceptional Point. *Phys. Rev. Lett.* **123**, 213901  
219 (2019).
- 220 12. Nyquist, B. H. Thermal agitation of electric charge in conductors. *Phys. Rev.* **32**, 110 (1928).

221

222
