# Supplementary material for: An ultrasensitive multimodal intracranial pressure biotelemetric system enabled by exceptional point and iontronics
Source: PubMed Central journal article supplement — Nat Commun. 2024 Nov 5;15:9557. doi: 10.1038/s41467-024-53836-8 (PMC11538422; doi:10.1038/s41467-024-53836-8), 2024-11-05
Supplement: 41467_2024_53836_MOESM3_ESM.pdf [file 41467_2024_53836_MOESM3_ESM.pdf]

# An ultrasensitive multimodal intracranial pressure biotelemetric system enabled by exceptional point and iontronics

Corresponding Author: Professor Jikui Luo

**This file contains all reviewer reports in order by version, followed by all author rebuttals in order by version.**

Version 0:

Reviewer comments:

Reviewer #1

(Remarks to the Author)

The manuscript proposed a new intracranial pressure (ICP) sensor that amplified by new technologies including iontronic pressure transducer and exceptional-point (EP) wireless system. The new sensor demonstrated several advantages such as high sensitivity and high resolution. The results were well presented and could be interest to the audience of Nat Commun. I have following questions.

1. Recent studies pointed out that the sensitivity at the EP cannot be enhanced because of the noise at the EP. How much is the sensitivity enhanced? Why the sensitivity can be enhanced in this study? Noise analysis is needed.
2. For an EP circuit with bifurcation effect, the resonance splits and one resonance shifts to a higher frequency and the other one lower. However, as shown in this study (such as Fig. 2c, 4b, et.), the two resonant frequencies shifted to the same direction, and no bifurcation effect cannot be observed. These results are conflicting.
3. The bifurcated frequencies are in the strong coupling regime of parity-time symmetric circuit. However, the high-coupling condition is challenging in the ICP sensor because of the presence of tissue and skull, especially for large animal model and human. How this problem is solved?
4. The heartbeat signal in Fig. 5g are not in well agreement with ECG signals. Seems the fluctuations of resonant frequency are noise. More plots are needed to validate the heartbeat signals.
5. The quality factor defined In theoretical analysis (Line 101) is confusing. Given this definition, the quality factors should be fixed after the circuit's design. Why the quality factors in Fig. 2c are changing?
6. Typo in Line 213, 116. Typo in Line 232, no "quality factors". Typo in Line 235, no "dashed lines".
7. Some important references are missing, including already reported EP biosensors (Dong et al., Nat Electron 2, 335-342 (2019); Li et al., Phy Rev Lett 130, 227201 (2023)) and very recent EP sensors in other fields (Kim et al., eLight 4, 6 (2024); Lee et al., eLight 3, 20 (2023)).

Reviewer #2

(Remarks to the Author)

The noteworthy results from this work can be summarized as follows:

1. Proposed System: Introduction of an exceptional point (EP)-based biotelemetric system for continuous and real-time wireless intracranial pressure (ICP) monitoring using an iontronic capacitive pressure transducer.
2. Enhanced Performance: The system leverages EP degeneracy combined with a highly sensitive iontronic transducer, leading to significant improvements in reliability, resolution, and sensitivity.
3. Sensitivity: Achieved a maximum relative sensitivity of 115.95 kHz/mmHg, which is nearly an order of magnitude higher than current ICP sensing systems.
4. Accuracy: Capable of detecting pressure variations as small as one-thousandth of a millimeter of mercury, greatly surpassing the accuracy of commercial ICP sensors.
5. Validation: In-vivo experiments conducted on a rabbit model validated the practical efficacy of the system, showing its superior sensitivity compared to traditional ICP probes.
6. Multi-modal Detection: The system can accurately identify various degrees of pressure signals and perform multi-modal

detection, including minute ICP fluctuations caused by physiological processes such as respiration and cardiac activity.  
7. Comprehensive Monitoring: The system not only monitors ICP but also concurrently tracks respiratory and heart rates, simplifying clinical procedures and enhancing clinical utility by providing a comprehensive monitoring solution in a single device.

8. Healthcare Applications: The integration of this biotelemetry system into bio-implantation practices holds significant promise for healthcare applications, particularly in continuous monitoring of vital signs, potentially transforming patient care and monitoring practices.

Will the work be of significance to the field and related fields? How does it compare to the established literature? If the work is not original, please provide relevant references.

Yes, this work is likely to be significant to the field of biomedical engineering and related fields, particularly in the areas of biotelemetry, intracranial pressure (ICP) monitoring, and patient care technology. Here's how it compares to the established literature and its potential impact:

Significance to the Field:

1. Advancement in ICP Monitoring:

Higher Sensitivity and Accuracy: The proposed system's maximum relative sensitivity of 115.95 kHz/mmHg and the ability to detect pressure variations as small as one-thousandth of a millimeter of mercury are notable advancements over existing ICP monitoring technologies. This could significantly improve patient outcomes by enabling more precise and early detection of abnormal ICP levels.

Wireless Biotelemetry: The continuous and real-time wireless monitoring capability represents a substantial improvement in patient comfort and mobility compared to traditional wired systems.

2. Multi-modal Detection:

The ability to monitor not only ICP but also respiratory and cardiac activity in a single device simplifies clinical procedures and provides a more comprehensive picture of the patient's physiological state, which could be particularly valuable in intensive care settings.

3. Potential Healthcare Applications:

The integration of this system into bio-implantation practices could transform patient care by enabling continuous, real-time monitoring of vital signs, potentially reducing the need for invasive procedures and frequent hospital visits.

Comparison to Established Literature:

1. Current Sensing Systems:

Traditional ICP monitoring systems, such as ventricular catheters and fiber optic transducers, typically have lower sensitivity and resolution compared to the proposed EP-based system. These systems often require invasive procedures and are less capable of detecting minute pressure fluctuations.

2. Wireless and Telemetric Systems:

While there have been advancements in wireless ICP monitoring, such as the use of telemetric sensors, these systems generally do not achieve the same level of sensitivity and resolution as reported in this work.

Originality and Novelty:

The work appears to be original in its application of EP degeneracy with an iontronic capacitive pressure transducer for ICP monitoring, achieving unprecedented sensitivity and accuracy levels. The integration of multi-modal detection capabilities within a single wireless biotelemetric system also represents a novel advancement over current technologies.

Conclusion:

Given the enhancements in sensitivity, accuracy, and the added functionality of concurrent monitoring of respiratory and cardiac activity, this work has the potential to make a significant impact on the field of ICP monitoring and broader healthcare applications. It addresses several limitations of current technologies and introduces innovative solutions that could improve patient care and monitoring practices.

Major concerns:

Within the literature regarding ICP and ICC (intracerebral compliance) there are new advanced system that was not considered and compared with this data regarding the present manuscript. The authors should provide additional literature regarding ICP measurements using Brain4care system, particularly, the robust publications as following:

<https://brain4.care/en/home-english/>

95

• Article | Characterization of intracranial compliance in healthy subjects using a noninvasive method - results from a multicenter prospective observational study

Gabriela Nagai Ocamoto, Lucas Normando da Silva, Camila da Silva Rocha Tomaz, Matheus Toshio Hisatugu, Gustavo Frigieri, Danilo Cardim, Roberta Lins Gonçalves, Thiago Luiz Russo, Robson Luis Oliveira de Amorim.

DOI: <https://doi.org/10.1007/s10877-024-01191-w>

94

• Article | Effects of moderate sedation induced by propofol or midazolam on intracranial pressure

Bianca Drewnowski, José Carlos Rebuglio Velloso, Rafael Nastas Acras, Fábio André dos Santos.

DOI: <https://doi.org/10.7322/abcshs.2022098.2164>

- 93  
• Article | Methodology for non-invasive monitoring of intracranial pressure waves in dogs with traumatic brain injury using the brain4care@ BCMM/2000 monitor  
Thyara Weizenmann, Mônica Vicky Bahr Arias.  
DOI: <https://doi.org/10.35172/rvz.2024.v31.1583>
- 92  
• Article | A Comprehensive Perspective on Intracranial Pressure Monitoring and Individualized Management in Neurocritical Care: Results of a Survey with Global Experts  
Sérgio Brasil, Daniel Agustín Godoy, Walter Videtta, Andrés Mariano Rubiano, Davi Solla, Fabio Silvio Taccone, Chiara Robba, Frank Rasulo, Marcel Aries, Peter Smielewski, Geert Meyfroidt, Denise Battaglini, Mohammad I. Hirzallah, Robson Amorim, Gisele Sampaio, Fabiano Moulin, Cristian Deana, Edoardo Picetti, Angelos Kolias, Peter Hutchinson, Gregory W. Hawryluk, Marek Czosnyka, Ronney B. Panerai, Lori A. Shutter, Soojin Park, Carla Rynkowski, Jorge Paranhos, Thiago H. S. Silva, Luiz M. S. Malbouisson and Wellingson S. Paiva.  
DOI: <https://doi.org/10.1007/s12028-024-02008-z>
- 91  
• Article | Noninvasive neuromonitoring in acute brain injured patients  
Sérgio Brasil, Randall Chesnut, Chiara Robba.  
DOI: <https://doi.org/10.1007/s00134-024-07406-7>
- 90  
• Article | A narrative review on financial challenges and healthcare costs associated with traumatic brain injury in the US  
Wander Valentim, Sérgio Brasil, Raphael Bertani.  
DOI: <https://doi.org/10.1016/j.wneu.2024.03.175>
- 89  
• Article | Non-Invasive Study of Intracranial Pressure in Pre- and Post-Chemotherapy Patients for the Treatment of Breast Neoplasia  
Lais Daiene Cosmoski, Cristiane Rickli, Danielle Cristyane Kalva Borato, Gustavo Henrique Frigieri, Nicollas Nunes Rabelo, Bruna França Bueno, José Carlos Rebuglio Velloso .  
DOI: <https://www.portalnepas.org.br/abcshs/article/view/1971>
- 88  
• Case report | Management of shunt dysfunction using noninvasive intracranial pressure waveform monitoring: illustrative case  
Raphael Bertani, Caio Perret , Stefan Koester, Paulo Santa Maria, Savio Batista, Sophia de Andrade Cavicchioli, Sany Tomomi de Almeida Rocha Arita, Ruy Monteiro, Gianne Lucchesi, Fernando Augusto Vasconcellos, Matheus Miranda , Wellingson Silva Paiva, Fernando Gomes Pinto.  
DOI: <https://pubmed.ncbi.nlm.nih.gov/38437677/>
- 87  
• Article | Validation of a Non-invasive Method Using Mechanical Extensometer for the Estimation of Intracranial Compliance by Repeated Measures Agreement Analysis  
Sanem Pinar Uysal, Hayley G. Williams, Mina Huerta, Nicolas R. Thompson, Catherine E. Hassett  
DOI: <https://doi.org/10.21203/rs.3.rs-3948331/v1>
- 86  
• Case report | Propofol effects over intracranial pressure waveform and cerebral hemodynamics: A case report  
Nathália Meneses Neves, Thais Rodrigues Kassahara, Sany Tomomi de Almeida Rocha Arita, Elaine Peixoto, Sérgio Brasil.  
DOI: <https://doi.org/10.33448/rsd-v13i2.44982>
- 85  
• Article | Age as a predictive factor for reduced intracranial compliance in patients with headache  
Luiz Gabriel Gonçalves Cherain, Mateus Gonçalves de Sena Barbosa, Ghaspar Gomes de Oliveira Alves Francisco, Luiz Miguel Gonçalves Cherain, Gustavo Frigieri, Nicollas Nunes Rabelo .  
DOI: <https://doi.org/10.1007/s10877-023-01120-3>
- 84  
• Article | ICP wave morphology as a screening test to exclude intracranial hypertension in brain-injured patients: a non-invasive perspective  
Fabiano Moulin de Moraes, Sérgio Brasil, Gustavo Frigieri, Chiara Robba, Wellingson Paiva e Gisele Sampaio Silva.  
DOI: <https://doi.org/10.1007/s10877-023-01120-3>
- 83  
• Case report | Astrocytoma Mimicking Herpetic Meningoencephalitis: The Role of Non-Invasive Multimodal Monitoring in Neurointensivism  
Uri Adrian Prync Flato, Barbara Cristina de Abreu Pereira, Fernando Alvares Costa, Marcos Cairo Vilela, Gustavo Frigieri,

Nilton José Fernandes Cavalcante, Samantha Longhi Simões de Almeida.  
DOI: <https://doi.org/10.3390/neurolint15040090>

82

• Article | Epidemiological study of pediatric patients with signs and symptoms of intracranial hypertension with non-invasive cerebral compliance  
Luana Say, Caroline Mensor Folchini, Guilherme de Rosso Manços, Marinei Campos Ricieri, Fábio de Araújo Motta, Adriano Keijiro Maeda, Simone Carreiro Vieira Karuta.  
DOI: <https://doi.org/10.33448/rsd-v12i10.43481>

81

• Letter | Neuromonitoring-Here, There, and to Every Critically Ill Patient  
Juliana Caldas, Sergio Brasil, Rogério Passos.  
DOI: [10.1097/CCM.00000000000005926](https://doi.org/10.1097/CCM.00000000000005926)

80

• Article | Intracranial pressure waveform in patients with essential hypertension  
Matheus Martins da Costa, Ana Luiza Lima Sousa, Mikaelle Costa Correia, Sayuri Inuzuka, Thiago Oliveira Costa, Priscila Valverde O. Vitorino, Polyana Vulcano de Toledo Piza, Gustavo Frigieri, Antonio Coca, Weimar Kunz Sebba Barroso.  
DOI: <https://doi.org/10.3389/fcvm.2023.1288080>

79

• Article | Non-invasive intracranial pressure waveform analysis in Chiari Malformation type 1: A pilot trial  
Eloy Rusafa Neto, Wellington Silva Paiva, Róger Schimidt Brock, Cintya Yukie Hayashi, Marcia Mitie Nagumo, Maurício Oriente Segurado, Ana Luiza Zaninotto, Róbson Luis Amorim.  
DOI: <https://doi.org/10.1016/j.wneu.2023.11.067>

78

• Article | The influence of hemodialysis on intracranial pressure waveform in patients with chronic kidney disease: an observational study  
Mariana Schechtel Koch, Bianca Drewnowski, Cristiane Rickli, Fábio André dos Santos, Gilberto Baroni, José Carlos Rebuglio Velloso.  
DOI: <https://doi.org/10.1590/1516-3180.2023.0068.R1.07072023>

77

• Article | Multimodal monitoring intracranial pressure by invasive and noninvasive means  
Fabiano Moulin de Moraes, Erica Navarro Borba Adissy, Eva Rocha, Felipe Chaves Duarte Barros, Flávio Geraldo Rezende Freitas, Maramelia Miranda, Raul Alberto Valiente, João Brainer Clares de Andrade, Feres Eduardo Aparecido Chaddad-Neto e Gisele Sampaio Silva.  
DOI: <https://doi.org/10.1038/s41598-023-45834-5>

76

• Article | Predicting short-term outcomes in brain-Injured patients: A comprehensive approach with transcranial Doppler and intracranial compliance assessment  
Sergio Brasil, Danilo Cardim, Juliana Caldas, Chiara Robba, Fabio Silvio Taccone, Marcelo de-Lima-Oliveira, Márcia Harumy Yoshikawa, Luiz Marcelo Sá Malbouisson, Wellington Silva Paiva.  
DOI: <https://doi.org/10.21203/rs.3.rs-3406169/v1>

75

• Article | Intracranial pressure changes of cardiac patients that have passed by extracorporous circulation: A brief literature review  
Lais Daiene Cosmoski, Bianca Drewnowski, Bruna França Bueno, Cristiane Rickli, Lisiane Cristine Lopes, Mariana Schechtel Koch, José Carlos Rebuglio Velloso.  
DOI: [http://dx.doi.org/10.33448/rsd-v11i15.37512](https://dx.doi.org/10.33448/rsd-v11i15.37512)

74

• Editorial | An Unexpected Correlation Between Non-Invasive Intracranial Pressure Waveform Assessment in Hypertensive Patients. Could This Be the Link Between Hypertension and Cerebrovascular Diseases as Well as Cognitive Impairments?  
Luciano Brandão Machado, Michele Madeira Brandão, Andre Ferro, Tales Shinji Sawakuchi Minei, Igor José Nogueira Gualberto, Nivaldo Alonso.  
DOI: <https://doi.org/10.18103/mra.v11i7.2.4166>

73

• Experimental | Non-invasive monitoring of intracranial pressure waveforms using Braincare® BCMM 2000 monitor in dogs with myelopathies undergoing myelography  
Cardoso GS, Nogueira JF, Arias MVB.  
DOI: <https://doi.org/10.1590/1678-5150-PVB-7132>

72

• Case report | Anesthesia for preoperative non-invasive intracranial pressure measurement in a child with Apert syndrome: a case report

Luciano Brandão Machado, Michele Madeira Brandão, Andre Ferro, Tales Shinji Sawakuchi Minei, Igor José Nogueira Gualberto, Nivaldo Alonso.

DOI: <https://doi.org/10.46900/apn.v5i3.190>

71

• Article | Comorbidities and the occurrence of changes in Intracranial Compliance in elderly

Cristiane Rickli Barbosa, José Carlos Rebuglio Velloso, Lais Daiene Cosmoski, Mariana Schechtel Koch.

DOI: <https://doi.org/10.53660/CLM-1842-23M51>

70

• Doing more with less on intracranial pressure monitoring

Daniel A. Godoy, Wellingson S. Paiva. 2023, World Neurosurgery.

DOI: <https://doi.org/10.1016/j.wneu.2023.07.055>

69

• Article | Analysis of intracranial pressure waveform using a non-invasive method in individuals with craniosynostosis

Michele Madeira Brandão; Cristiano Tonello, Isabella Parizotto; Luciano Brandão Machado; Nivaldo Alonso. 2023, Child's Nervous System.

DOI: <https://doi.org/10.1007/s00381-023-06092-y>

68

• Article | The use of noninvasive measurements of intracranial pressure in patients with traumatic brain injury: a narrative review

Luiz Gustavo Guimarães Sacramento, André Vitor Rocha Queiroz, Fernanda de Andrade Dias Leite, Henrique Lacerda Lage Lopes de Oliveira, Thais Yuki Kimura, Rodrigo Moreira Faleiro. 2023, Arquivos de Neuro-Psiquiatria.

DOI: <https://doi.org/10.1055/s-0043-1764411>

67

• Article | Intracranial compliance and volumetry in patients with traumatic brain injury

Caroline Link, Thomas Markus D'Haese, Gustavo Frigieri, Jose Carlos Rebuglio Velloso, Leonardo Welling. 2023, Surgical Neurology International.

DOI: [10.25259/SNI\\_314\\_2023](https://doi.org/10.25259/SNI_314_2023)

66

• Article | A Point-Of-Care Noninvasive Technique For Surrogate ICP Waveforms Application In Neurocritical Care

Sérgio Brasil, Daniel A. Godoy and Gregory W. J. Hawryluk. 2023, Neurocritical Care.

DOI: <https://doi.org/10.1007/s12028-023-01786-2>

65

• Letter | A new noninvasive method can effectively assess intracranial compliance

Sérgio Brasil e Daniel Agustín Godoy. 2023, Acta Neurochirurgica.

DOI: <https://doi.org/10.1007/s00701-023-05644-0>

64

• Article | Comparison of Noninvasive Measurements of Intracranial with Tap Test Results in Patients with Idiopathic Normal Pressure Hydrocephalus

Gabriel André da Silva Mendes, Cintya Yukie Hayashi, Gustavo Henrique Frigieri Vilela, Lissa Kido, Manoel Jacobsen Teixeira, Fernando Campos Gomes Pinto. 2023, Neuropsychiatric Disease and Treatment.

DOI: <https://doi.org/10.2147/NDT.S402358>

63

• Case Report | Noninvasive intracranial pressure involving real-time waveform analysis in a child undergoing general anesthesia: a case report

Gabriela Saba, Thaís Condé, Vinícius Quintão, Gustavo Vilela, Ricardo Carlos, Maria Carmona, 2023, Perioperative Anesthesia Reports.

DOI: <http://dx.doi.org/10.4322/par.000223>

62

• Article | The intracranial compartmental syndrome: a proposed model for acute brain injury monitoring and management

Daniel Agustín Godoy, Sérgio Brasil, Corrado Iaccarino, Wellingson Paiva, Andres M. Rubiano. 2023, Critical Care.

DOI: [10.1186/s13054-023-04427-4](https://doi.org/10.1186/s13054-023-04427-4)

61

• Case Report | Noninvasive intracranial pressure monitoring throughout brain compliance guiding a ventriculoperitoneal shunt replacement in hydrocephalus—case report

Nelci Zanon, Victor Hugo da Costa Benalia, Thiago Hoesker, Cintya Yukie Hayashi, Gustavo Frigieri, Giselle Coelho. 2023, Child's Nervous System.

DOI: 10.1007/s00381-023-05922-3

60

• Case report | A glimpse into multimodal neuromonitoring in acute liver failure: a case report  
Stefano Zorzi, Amanda Ayako Minemura Ordinola, Eduardo Cunha De Souza Lima, Gabriela Martins Teixeira, Michele Salvagno, Elda Diletta Sterchele, Fábio Silvio Taccone.  
DOI: <http://dx.doi.org/10.1097/MS9.0000000000001519>

59

• Article | Qualitative Evaluation of Intracranial Pressure Slopes in Patients Undergoing Brain Death Protocol  
Mylena Miki Lopes Ideta, Louise Makarem Oliveira, Daniel Buzaglo Gonçalves, Mylla Christie de Oliveira Paschoalino, Nise Alessandra de Carvalho Sousa, Marcus Vinicius Della Coletta, Wellington Paiva, Sérgio Brasil and Robson Luís Oliveira de Amorim.  
DOI: 10.3390/brainsci13030401

58

• Letter | Application of non-invasive ICP waveform analysis in acute brain injury: Intracranial Compliance Scale  
Gustavo Frigieri, Chiara Robba, Fábio Santana Machado, Joao A. Gomes and Sérgio Brasil. 27 January 2023 ( 27 Janeiro 2023)  
DOI: 10.1186/s40635-023-00492-9

57

• Article | Noninvasive intracranial pressure waveforms for estimation of intracranial hypertension and outcome prediction in acute brain injured patients  
Brasil, S, et al. 18 Nov. 2022.  
DOI: <https://doi.org/10.1007/s10877-022-00941-y>

56

• Article | Intracranial compliance in type 2 diabetes mellitus and its relationship with the cardiovascular autonomic nervous control  
G.A.M. Galdino, et al. Set. 2022  
DOI: <https://doi.org/10.1590/1414-431X2022e12150>

55

• Article | Assessment of Cerebral Autoregulation Using Invasive and Noninvasive Methods of Intracranial Pressure Monitoring  
Hassett, C.E., Uysal, S.P., Butler, R. et al. Set. 2022  
DOI: [doi.org/10.1007/s12028-022-01585-1](https://doi.org/10.1007/s12028-022-01585-1)

54

• Letter | Intracranial pressure pulse morphology: the missing link?  
Brasil, S. 29 Ago, 2022  
DOI: [doi.org/10.1007/s00134-022-06855-2](https://doi.org/10.1007/s00134-022-06855-2)

53

• Article | Noninvasive intracranial pressure in patients with traumatic brain injury  
Link C, Botelho AF, Dhaese TM, Frigieri G, Velloso JCR, Welling LC. 08 Ago. 2022  
DOI: [doi.org/10.33448/rsd-v11i10.33106](https://doi.org/10.33448/rsd-v11i10.33106)

52

• Article | Mechanical Hyperinflation Maneuver and intracranial pressure of critical neurological patients: protocol for a randomized clinical trial  
Souza D, Branco MW, Carraro Júnior H, Zocolotti AMD, Takeda SYM, Valderramas S. 13 Jul, 2022  
Research Square  
Trials

51

• Article | Preliminary assessment of the relationship between blood pressure and intracranial pressure in patients with different stages of chronic kidney disease  
Balzer, E.R., Koch, M.S., Drewnowski, B., Santos, F.A. dos., Baroni, G., Schuinski, A.F.M. and Velloso, J.C.R. Jun. 2022.  
DOI: [doi.org/10.33448/rsd-v11i8.31150](https://doi.org/10.33448/rsd-v11i8.31150).

50

• Case Report | Alteration of intracranial compliance in a patient with chronic kidney disease and T1 diabetes mellitus  
Koch, M.S., Drewnowski, B., Balzer, E.R., Baroni, G., Schuinski, A.F.M. and Velloso, J.C.R. Jun. 2022. DOI: [doi.org/10.33448/rsd-v11i8.31153](https://doi.org/10.33448/rsd-v11i8.31153).

49

• Article | Relationship Between Dialysis Quality And Brain Compliance In Patients With End-Stage Renal Disease

Mascarenhas S, Rickli C, Frigieri GH, Velloso JCR, Schuinski, AFM. May 2022. DOI: doi.org/10.1590/1516-3180.2021.0117.R1.14092021

48

• Case Report | Noninvasive Monitoring Of Intracranial Pressure After Cardiac Surgery  
Ayres, C., Velloso, J. C. R. 10 May, 2022. DOI: doi.org/10.33448/rsd-v11i6.29492

47

• Case Report | Use of non-invasive sensor to assess intracranial compliance in the management of migraine patients  
Cherain LGG, Barbosa MGS, Souza RLV et al. 22 April 2022 DOI: doi.org/10.21203/rs.3.rs-1162693/v2

46

• Article | Non-invasive monitoring of intracranial pressure in cardiovascular diseases  
Ayres, Claudiane. 2022. Collection: Applied biomedical engineering. DOI: doi.org/10.22533/at.ed.896220604

45

• Article | Preliminary evaluation of a non-invasive device for monitoring intracranial pressure waveforms in dogs  
Bahr Arias MV, Conceição RT, Guimarães FC, Cardoso GS, Rocha NLFC. J Small Anim Pract. 2022 Mar 4. DOI: doi.org/10.1111/jsap.13460

44

• Article | Photosonic Treatment and Fibromyalgia: The Effect on Brain Compliance - Case Report  
Junior AEA, Carbinatto FM, Tomaz CSR, Bagnato VS (2022) J Nov Physiother 12: 510. DOI: doi.org/10.4172/2165-7025.1000510

43

• Article | Waveform Morphology as a Surrogate for ICP Monitoring: A Comparison Between an Invasive and a Noninvasive Method  
de Moraes FM, Rocha E, Barros FCD, Freitas FGR, Miranda M, Valiente RA, de Andrade JBC, Neto FEAC, Silva GS. 2022: 24:1–9. DOI: doi.org/10.1007/s12028-022-01477-4

42

• Article | From disease to noninvasive intracranial monitoring  
Folchini, Caroline Mensor et al. 2022: ISSN 1678-4227. DOI: doi.org/10.1590/0004-282X-ANP-2021-0298

41

• Article | Noninvasive intracranial pressure monitoring in women with migraine  
Rossi, D.M., Bevilaqua-Grossi, D., Mascarenhas, S. et al. 2022: Sci Rep 12, 2635. DOI: doi.org/10.1038/s41598-022-06258-9

40

• Article | A novel noninvasive technique for intracranial compliance monitoring in neurocritical care  
Brasil, S. Journal of Personalized Medicine. DOI: https://doi.org/10.3390/jpm11121302

39

• Article | The use of a non-invasive intracranial pressure monitoring method in the intensive care unit to improve neuroprotection on postoperative patients following extracorporeal circulation  
Salomon, R. RBTI - Revista Brasileira de Terapia Intensiva. DOI: 10.5935/0103-507X.20210066

38

• Article | Intracranial Compliance Concepts and Assessment: A Scoping Review  
Ocamoto, G. Frontiers in Neurology. DOI: https://doi.org/10.3389/fneur.2021.756112

37

• Letter | Is It Possible To Monitor The Wave Form With Non-invasive Methods?  
Rabelo, N. World neurosurgery. DOI: https://doi.org/10.1016/j.wneu.2021.06.050

36

• Article | Noninvasive intracranial pressure real-time waveform analysis monitor during prostatectomy robotic surgery and Trendelenburg position: case report  
Saba, G. Brazilian Journal of Anesthesiology. DOI: https://doi.org/10.1016/j.bjane.2021.09.003

35

• Case Report | Non-invasive intracranial pressure monitoring in idiopathic intracranial hypertension and lumbar puncture in pediatric patient: case report  
Dhaese, T. Surgical Neurology International. DOI: 10.25259/SNI\_124\_2021

34

• Case Report | Effect of hemodialysis on cerebral compliance assessed in a non invasive way  
Rickly, C. Brazilian Journal of Development. DOI: doi.org/10.34117/bjdv7n1-689

- 33
- Case Report | Elderly non invasive intracranial pressure monitorization: a report of waveform morphology and cerebral compliance  
Velloso, J. Brazilian Journal of Development. DOI: doi.org/10.34117/bjdv7n1-470
- 3
- 2
- Case report | Untreatable Headache in a Child with Ventriculoperitoneal Shunt Managed by Use of New Non-Invasive ICP Waveform: a Case Report  
Paraguassu, G. Frontiers in Neuroscience. DOI: <https://doi.org/10.3389/fnins.2021.601945>
- 31
- Chapter | Non-Invasive intracranial pressure monitoring  
Welling, L. LIVRO: Neurocritical Care for Neurosurgeons: Principles and Applications. DOI: <https://doi.org/10.1007/978-3-030-66572-2>
- 30
- Article | Noninvasive intracranial pressure monitoring in chronic Stroke patients with sedentary behavior-pilot study  
Ocamoto, G. Acta Neurochirurgica Supplement. DOI: doi.org/10.1007/978-3-030-59436-7\_12
- 29
- Letter | The Noninvasive Intracranial Pressure in Patients with Intracranial Hypertension  
Rabelo, N. Clinics in Surgery. DOI: [https://www.clinicsinsurgery.com/pdfs\\_folder/cis-v6-id3144.pdf](https://www.clinicsinsurgery.com/pdfs_folder/cis-v6-id3144.pdf)
- 28
- Case report | Non-invasive monitoring of intracranial pressure during midazolam-induced moderate sedation for upper gastro intestinal endoscopy  
Drewnoski, B. Brazilian Journal of Development. DOI: <https://doi.org/10.34117/bjdv.v7i5.29327>
- 27
- Letter | Neurosurgery and Manned Spaceflight  
Rabelo, N. Neurosurgery. DOI: doi.org/10.1093/neuros/nyab133
- 26
- Article | Intracranial pressure and laboratory parameters in high and low risk pregnant women  
Silveira, D. Surgical Neurology International. DOI: doi.org/10.25259/SNI\_109\_2021
- 25
- Article | Noninvasive intracranial pressure monitoring methods: a critical review  
Moulin, F. 2021. Arquivos de Neuro Psiquiatria. DOI: doi.org/10.1590/0004-282X-ANP-2020-0300
- 24
- Article | Use of non-invasive intracranial pressure pulse waveform to monitor patients with End-Stage Renal Disease (ESRD)  
Rickly, C. PLOS ONE. DOI: doi.org/10.1371/journal.pone.0240570
- 23
- Article | Comparison of waveforms between non-invasive and invasive ICP monitoring  
Gomes, I. Acta Neurochirurgica Supplement. DOI: doi.org/10.1007/978-3-030-59436-7\_28
- 22
- Article | Intracranial compliance assessed by intracranial pressure pulse waveform  
Brasil, S. Brainsciences. DOI: doi.org/10.3390/brainsci11080971span>
- 21
- Article | A nanometer resolution wireless device for non invasive intracranial pressure monitoring  
Andrade, R. IEEE Sensors Journal. DOI: doi.org/10.1109/JSEN.2021.3090648
- 20
- Article | Cerebral Hemodynamics And Intracranial Compliance Impairment In Critically Ill Covid-19 Patients: A Pilot Study  
Brasil, S. 2021. Brainsciences. DOI: doi.org/10.3390/brainsci11070874
- 19
- Article | The historic evolution of intracranial pressure and cerebrospinal fluid pulse pressure concepts: 2 centuries of challenges  
Rabelo, N. Surgical Neurology International. DOI: doi.org/10.25259/SNI\_53\_2021
- 18
- Article | Obesity and its implications on cerebral circulation and intracranial compliance in severe covid 19  
Brasil, S. 2021. Obesity Science & Practice. DOI: doi.org/10.1002/osp4.534



- 17  
• Article | Intracranial Pressure During the Development of Renovascular Hypertension  
Fernandes. Hypertension DOI: doi.org/10.1161/HYPERTENSIONAHA.120.16217
- 16  
• Chapter | Intracranial pressure waveform. History, fundamentals and applications in brain injuries  
Frigieri, G. LIVRO IntechOpen: Advancement and New Understanding in Brain Injury. DOI:  
doi.org/10.5772/intechopen.94077
- 15  
• Chapter | Management of patients with brain injury using noninvasive methods  
Frigieri, G. LIVRO IntechOpen: Advancement and New Understanding in Brain Injury. DOI:  
doi.org/10.5772/intechopen.94143
- 14  
• Letter | Use of Intracranial Pressure Monitoring in Patients with Severe Traumatic Brain Injury  
Rabelo, N. World Neurosurgery. DOI: doi.org/10.1016/j.wneu.2020.07.222
- 13  
• Letter | Intracranial pressure monitoring: Challenge beyond the threshold numerical value  
Rabelo, N. Journal of Neurosurgery. DOI: doi.org/10.3171/2020.9.JNS203395
- 12  
• Article | Use of the Kirkpatrick methodology for training in new non-invasive intracranial pressure monitoring technology for nurses  
Barros, T. Brazilian Journal of Health Review. DOI: doi.org/10.34119/bjhrv3n3-098
- 11  
• Article | Intracranial compliance concepts and assessment a scoping review protocol  
Russo, T. Research Square. DOI: doi.org/10.21203/rs.3.rs-43616/v1
- 10  
• Article | In-flight analysis of intracranial pressure in pilots undergoing variation in Gz  
Bezerra, T. Aeronautics and Aerospace Open Access Journal. 2018;2(3):126–131. DOI: doi: 10.15406/aoaj.2018.02.00042
- 09  
• Article | Analysis of a minimally invasive intracranial pressure signals during infusion at the subarachnoid spinal space of pigs  
Frigieri, G. Acta Neurochirurgica Supplement. 2018;126:75-77. DOI: doi: 10.1007/978-3-319-65798-1\_16
- 08  
• Article | Analysis of a non-invasive intracranial pressure monitoring method in patients with traumatic brain injury  
Frigieri, G. Acta Neurochirurgica Supplement. 2018;126:107-110. DOI: doi: 10.1007/978-3-319-65798-1\_23
- 07  
• Article | Noninvasive intracranial pressure monitoring for HIV-associated cryptococcal meningitis  
Bolella, V. Brazilian Journal of Medical and Biological Research. 2017 Aug 7;50(9):e6392. DOI: doi: 10.1590/1414-431X20176392
- 06  
• Article | Prediction of intracranial hypertension through noninvasive intracranial pressure waveform analysis in pediatric hydrocephalus  
Ballesterio, M. Child's Nervous System. 2017 Sep;33(9):1517-1524. DOI: doi: 10.1007/s00381-017-3475-1. Epub 2017 Jun 16
- 05  
• Article | Characterization of ICP behavior in an experimental model of hemorrhagic stroke in rats  
Cardim, D. Acta Neurochirurgica Supplement. 2016;122:121-4. DOI: doi: 10.1007/978-3-319-22533-3\_24
- 04  
• Article | Characterization of intracranial pressure behavior in chronic epileptic animals: a preliminary study  
Cardim, D. Acta Neurochirurgica Supplement. 2016; 122:329-333. DOI: doi: 10.1007/978-3-319-22533-3\_65
- 03  
• Article | Validation of a new minimally invasive intracranial pressure monitoring method by direct comparison with an invasive technique  
Frigieri, G. Acta Neurochirurgica Supplement. 2016;122:97-100. DOI: doi: 10.1007/978-3-319-22533-3\_19

02

• Article | Validation of a new noninvasive intracranial pressure monitoring method by direct comparison with an invasive technique

Cabella. B. Acta Neurochirurgica Supplement. 2016;122:93-6. DOI: doi: 10.1007/978-3-319-22533-3\_18

01

• Article | The new ICP minimally invasive method shows that the monro-kellie doctrine is not valid.

Mascarenhas, S. Acta Neurochirurgica Supplementum. 2012: 117 – 120. DOI: doi.org/10.1007/978-3-7091-0956-4\_21

Version 1:

Reviewer comments:

Reviewer #1

(Remarks to the Author)

This revision has been carefully made, and my major concerns have been addressed. Hence i fully support the publication.

Reviewer #2

(Remarks to the Author)

The current version of this manuscript was improved. No additional comments.

**Open Access** This Peer Review File is licensed under a Creative Commons Attribution 4.0 International License, which permits use, sharing, adaptation, distribution and reproduction in any medium or format, as long as you give appropriate credit to the original author(s) and the source, provide a link to the Creative Commons license, and indicate if changes were made.

In cases where reviewers are anonymous, credit should be given to 'Anonymous Referee' and the source.

The images or other third party material in this Peer Review File are included in the article's Creative Commons license, unless indicated otherwise in a credit line to the material. If material is not included in the article's Creative Commons license and your intended use is not permitted by statutory regulation or exceeds the permitted use, you will need to obtain permission directly from the copyright holder.

To view a copy of this license, visit <https://creativecommons.org/licenses/by/4.0/>

## Response Letter

### **An ultrasensitive multimodal intracranial pressure biotelemetric system enabled by exceptional point and iontronics**

We would like to express our gratitude to all reviewers for their valuable and constructive comments on our manuscript. In the following, we address each of the issues raised by the reviewers and outline the corresponding changes we have made in our revised manuscript. We believe that implementing the reviewers' suggestions has significantly enhanced the quality of our work. Our aim is to ensure that the revised manuscript meets the criteria of impact, innovation, and interest for publication in *Nature Communications*, as judged by both the reviewers and the editor.

#### **Reviewer #1:**

##### **Comment 0**

The manuscript proposed a new intracranial pressure (ICP) sensor that amplified by new technologies including iontronic pressure transducer and exceptional-point (EP) wireless system. The new sensor demonstrated several advantages such as high sensitivity and high resolution. The results were well presented and could be interest to the audience of *Nat Commun*.

##### **Our response:**

We are thankful to the reviewer for your careful reading of our revised manuscript and the overall positive evaluations.

##### **Comment 1**

Recent studies pointed out that the sensitivity at the EP cannot be enhanced because of the noise at the EP. How much is the sensitivity enhanced? Why the sensitivity can be enhanced in this study? Noise analysis is needed.

**Our response:**

We very much appreciate the reviewer for pointing out this issue. In fact, the exceptional point (EP)-based sensors do enhance the sensitivity but provide no fundamental signal-to-noise ratio (SNR) enhancement<sup>1</sup>. That is said, while the system has enhanced responsivity towards the target perturbations around EP, any unwanted noise existing in the system will also be amplified in the same magnitude. Therefore, the unwanted noise of the sensing system should be suppressed to be sufficiently small compared to the target perturbation, which allows us to benefit from the sensitivity enhancement brought by the EP with minimum noise.

Generally, there are several noise sources in electromagnetic systems, such as shot noise, flicker noise, thermal noise, and quantum noise. Particularly, quantum noise originated from the quantization nature of charged carriers and photons is significant in optical and photonic systems, but can be ignored in our radio-frequency EP sensing system<sup>2</sup>. Shot noise and flicker ( $1/f$  noise) exist in solid-state devices and vacuum electronics, which are important only at low frequencies (i.e., 1 Hz to 1 MHz). Consequently, thermal noise (Johnson-Nyquist noise<sup>3</sup>) sourced from the thermal agitation of bounded charges in devices (especially in resistors), which simultaneously introduces the resonance frequency shifts, is considered the dominant noise source in this work.

According to Planck's black body radiation law, the electrons in a real-world resistor are in random motion, whose kinetic energy may produce small and random voltage fluctuations across this resistor with a zero average but a nonzero root mean square (RMS) value, which can be expressed as

$$\bar{V}_{\text{noise}} = \sqrt{\frac{4hfBR}{e^{hf/kT} - 1}}, \quad (1)$$

where  $h$  denotes the Planck's constant,  $k$  is the Boltzmann's constant,  $T$  represents the temperature in kelvin,  $f(B)$  is the center frequency (bandwidth), and  $R$  is the resistance value. In the low frequency range where the approximation  $hf = kT$  takes account, the above equation can be simplified to  $\bar{V}_{\text{noise}} = \sqrt{4kTBR}$ . This indicates the noise voltage fluctuates between  $\pm\sqrt{8kTBR}$ . Therefore, the voltage across a non-ideal resistor can be decomposed into  $V' = V_R + V_{\text{noise}}$ , as seen in Fig. R1a. This model can also be equivalent to the series connection of an ideal resistor ( $R$ ) and a noisy resistor ( $R'$ ), as seen in Fig. R1b, such that  $V' = I(R + R') = IR + IR' = V_R + V_{\text{noise}}$ . Defining

a time-fluctuating parameter  $\varepsilon_{1,2} = R'/R$  where the subscript 1,2 denotes the deviation occurring to the resistors of gain or loss oscillators, we can analyze the resonance frequency fluctuations due to thermal noise. Here, to simplify our analysis, we assume  $\varepsilon_{1,2} \in [-\Delta, \Delta]$  where  $\Delta \propto \sqrt{8kTB/R}$ .

In experiments, the measurement of eigenfrequencies associated with the Hamiltonians is realized by tracking the dips of reflection spectra, which, in this work, is the reflection coefficient ( $S_{11}$ ) at the gain side (Fig. R1b and R1c). The noise-deviated  $S_{11}$ , considering the maximum noise ( $\varepsilon_{1,2} \equiv \Delta$ ), has the form of

$$S_{11} = \frac{\eta(1+\Delta)^2 \omega^2 + \eta\gamma^2[1-2\omega^2 - (\mu^2 - 1)\omega^4]}{[(1+\Delta)(\eta + \Delta\eta) - 2\omega^2] - 2i\gamma\omega(\omega^2 - 1) + \eta\gamma^2[1-2\omega^2 - (\mu^2 - 1)\omega^4]}, \quad (2)$$

which yields the maximized deviated resonance frequency to be

$$\omega_{1,2}' = \sqrt{\frac{(1+\Delta)^2 - 2\gamma^2 \pm \sqrt{(1+\Delta)^4 - 4\gamma^2(1+\Delta)^2 + 4\gamma^4\mu^2}}{2\gamma^2(\mu^2 - 1)}}. \quad (3)$$

The frequency fluctuation caused by the noise is  $\Delta\omega = \omega_{1,2} - \omega_{1,2}'$ . Taking parameters used in our experiments (e.g.,  $\gamma = 13.56$ ,  $\mu = 0.08$  and the system operates at  $f_0 \approx 24.1$  MHz and  $T = 290$  K), the above equation yields  $\Delta f = 2\pi\Delta\omega \approx 1$  kHz, which agrees well with our noise measurements in Fig. R1d that the measured frequency may have  $\pm 2.5$  kHz fluctuation. This noise-introduced frequency fluctuation is indeed ignorable compared to the frequency shift caused by the target pressure variations ( $\sim 10 - \sim 400$  kHz), which, therefore, does not negate the implementation of the EP for sensing.

In the revised manuscript, we have included the above discussions in Supplementary Material Note 7.

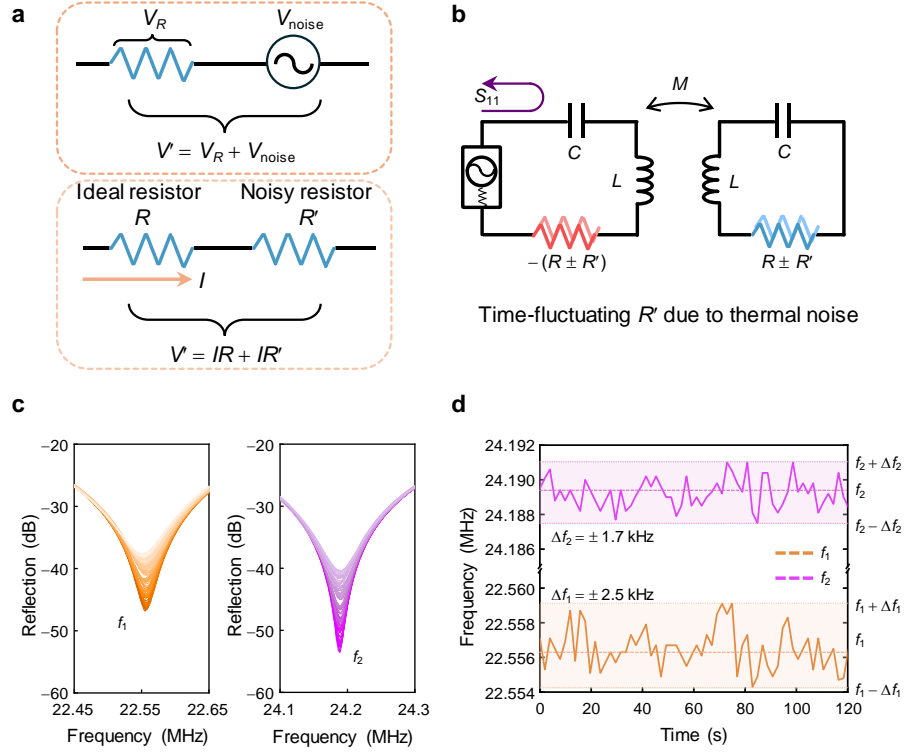

Fig. R1. (a) Circuit equivalent of a non-ideal resistor. (b) Circuit diagram of the EP sensing system considering the presence of thermal noise. (c) Reflection spectra measured within 120 seconds (per 2 seconds) without perturbations applied. (d) Frequency fluctuation caused by the noise.

## Comment 2

For an EP circuit with bifurcation effect, the resonance splits and one resonance shifts to a higher frequency and the other one lower. However, as shown in this study (such as Fig. 2c, 4b, et.), the two resonant frequencies shifted to the same direction, and no bifurcation effect cannot be observed. These results are conflicting.

## Our response:

This is a good point raised by this reviewer. The reviewer is correct that for normalized eigenfrequencies, i.e.,  $\omega_{1,2}$  is in the unit of  $\omega_0$ , the increase of  $\gamma$  ( $\gamma = R^{-1}\sqrt{L/C}$ ) will lead to the bifurcation of  $\omega_{1,2}$  to opposite directions. However, we should note here that if the variation of  $\gamma$  is induced due to the change in  $C$ , the resonance frequency ( $\omega_0 = 1/\sqrt{LC}$ ) also shifts. This

indicates that the non-normalized eigenfrequencies will shift in the same direction in the spectrum. This can be better understood from Fig. R2, where Fig. R2a denotes the normalized eigenfrequency shift and Fig. R2b represents the non-normalized eigenfrequency shift with respect to the change in  $\gamma$  (due to  $C$  variation). It can be seen that the non-normalized eigenfrequency will shift in the same direction but at different rates. In the previous manuscript Figs. 2b, 2d, and 2e (theoretical analysis), we exploited the normalized eigenfrequency, and in Fig. 2c and Fig. 4 (experimental measurements), we used the non-normalized eigenfrequency.

In the revised manuscript, we have carefully rephrased the sentences discussing the eigenfrequency bifurcation to avoid ambiguity.

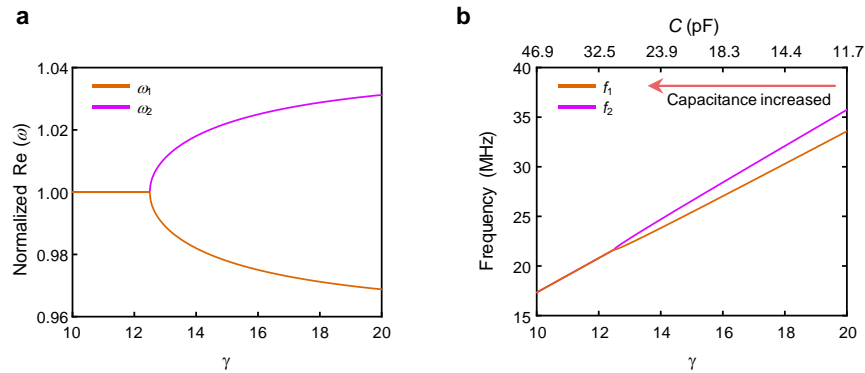

Fig. R2. (a) The real part  $\text{Re}(\omega)$  of the eigenfrequencies normalized with respect to  $\omega_0 = 1/\sqrt{LC}$  as a function of the non-Hermiticity parameter  $\gamma$ . (b) The non-normalized eigenfrequencies as a function of the non-Hermiticity parameter  $\gamma$  and capacitance  $C$ .

### Comment 3

The bifurcated frequencies are in the strong coupling regime of parity-time symmetric circuit. However, the high-coupling condition is challenging in the ICP sensor because of the presence of tissue and skull, especially for large animal model and human. How this problem is solved?

### Our response:

We sincerely thank the reviewer for bringing up this valuable question. The reviewer is correct that high-coupling or strong coupling is challenging in the ICP sensor because the strong coupling

requires a short distance between the sensor and reader coils, which, due to the presence of tissue and skull, is hard to achieve in reality. In our work, this problem is solved by using a weak coupling-based electronic EP system.

The exact solution of eigenfrequencies in the PT-symmetric electronic system, as a function of  $\gamma$  and the coupling strength  $\mu$ , has been given by ref. <sup>4</sup>, and has the form of

$$\omega_{1,2} = \pm \sqrt{\frac{2\gamma^2 - 1 \pm \sqrt{1 - 4\gamma^2 + 4\gamma^4 \mu^2}}{2\gamma^2(1 - \mu^2)}} \quad (4)$$

At the weak coupling regime, i.e.,  $\mu \ll 1$ , the eigenfrequencies can be approximated as

$$\omega_{1,2} = 1 \pm \frac{1}{2\gamma} \sqrt{\mu^2 \gamma^2 - 1}. \quad (5)$$

Figure R3a demonstrates that the exact solution and the approximation of eigenfrequencies can have a perfect agreement with each other when  $\mu < 0.1$ . Figure R3b illustrates that the weaker the coupling strength is, the larger  $\gamma$  should become to ensure the eigenfrequency bifurcation. The red dashed lines in Fig. R3 depict the operating point ( $\gamma = 13.96$ ,  $\mu = 0.08$ ) of the proposed system in this work, which is sufficiently close to the EP for better sensitivity and located in the exact symmetry phase for two real eigenfrequencies.

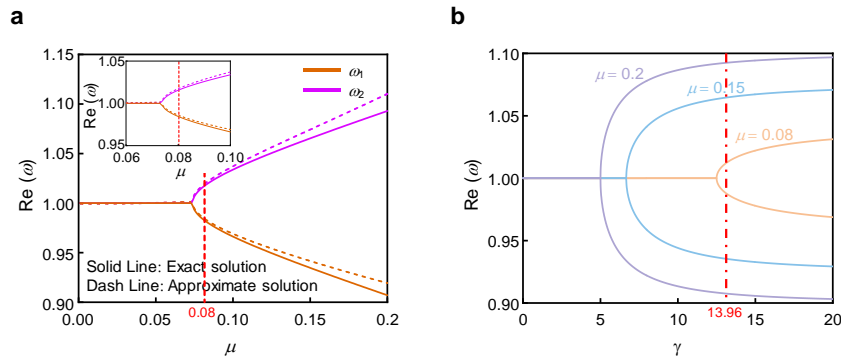

Fig. R3. (a) The exact and approximate solutions of the real part  $\text{Re}(\omega)$  of the eigenvalues as a function of coupling coefficient  $\mu$ . (b) The real part  $\text{Re}(\omega)$  of the eigenvalues as a function of the non-Hermiticity parameter  $\gamma$  at coupling coefficient  $\mu = 0.2, 0.15, 0.08$ .

#### Comment 4



The heartbeat signal in Fig. 5g are not in well agreement with ECG signals. Seems the fluctuations of resonant frequency are noise. More plots are needed to validate the heartbeat signals.

**Our response:**

We sincerely thank the reviewer for pointing out this issue. We believe that addressing this issue will indeed enhance the quality of our manuscript. In the response of comment 1, we have both theoretically and experimentally demonstrated that the noise-induced frequency fluctuations are within  $\pm 2.5$  kHz, which can be ignored compared to the eigenfrequency shift caused by the target pressure variations. To demonstrate that the fluctuations in Fig. 5g in the main text are extracted from the heartbeat signal instead of noise, we further perform experiments in the low-pressure range shown in Fig. R4. The results demonstrated that the noise-induced (no pressure applied) frequency fluctuations (marked in Fig. R4a and zoomed-in in Fig. R4b. ) are below 2 kHz, while the frequency fluctuations caused by the heartbeat signal ( $\sim 0.05$  mmHg, blue area marked in Fig. S9a) are  $\sim 25$  kHz (the grey area marked in Fig. R4a), which is more than one order of magnitude larger than the noise-induced fluctuation (Fig. R4b). In addition, the results in Fig. 4f, which demonstrates clear frequency differentiation under extremely weak pressure perturbations, further support this finding. Figure 5g shows that the frequency fluctuation caused by the heartbeat is about 25 kHz, significantly greater than that caused by noise. The fast Fourier transformation (FFT) analysis (Fig. R3c) of the ICP signal from Fig. 5f reveals two distinct peaks: one for breathing ( $\sim 0.33$  Hz) and another for heartbeat ( $\sim 3.76$  Hz), which closely matches the ECG results.

In the revised manuscript, we have included the above discussions in Supplementary Material Note 10.

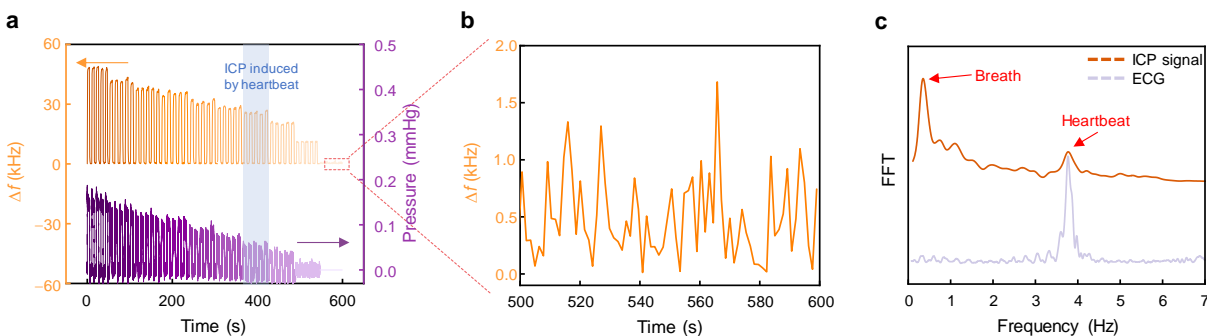

Fig. R4. (a) Frequency shift of  $\omega_2$  in response to low applied pressure (~ per 60 seconds). (b) Enlarged view of frequency shift without applied pressure. (c) FFT analysis of ICP signal and ECG.

### Comment 5

The quality factor defined in theoretical analysis (Line 101) is confusing. Given this definition, the quality factors should be fixed after the circuit's design. Why the quality factors in Fig. 2c are changing?

### Our response:

We very much appreciate the careful reading of this reviewer and pointing out this problem. We apologize that in the previous manuscript, the definition of quality factor was ambiguous. Generally, the quality factor can be categorized as bandpass quality factor, component quality factor, and pole quality factor. Previously, we adopted the component quality factor as the definition of  $\gamma$  but the bandpass quality factor in Fig. 4d in the main context. This explains the changing of quality factor in Fig. 2c.

To avoid the ambiguity, we have revised the definition of  $\gamma$  and only adopt the bandpass quality factor ( $Q = f_0 / BW$ ) in our paper, and the system exhibits its greatest Q-factor in the exact symmetry phase.

### Comment 6

Typo in Line 213, 116. Typo in Line 232, no “quality factors”. Typo in Line 235, no “dashed lines”.

### Our response:

We sincerely apologize for the previous oversights in our manuscript, which led to several typographical errors and inaccuracies. We greatly appreciate your meticulous review, which has given us the opportunity to improve the quality of our manuscript. In the revised manuscript, we

have addressed each of the issues you highlighted, and conducted a thorough review of the entire text to ensure that similar issues do not persist.

### **Comment 7**

Some important references are missing, including already reported EP biosensors (Dong et al., Nat Electron 2, 335-342 (2019); Li et al., Phy Rev Lett 130, 227201 (2023)) and very recent EP sensors in other fields (Kim et al., eLight 4, 6 (2024); Lee et al., eLight 3, 20 (2023)).

### **Our response:**

We express our gratitude to the reviewer for bringing these valuable references to our attention, which can help us improve the quality of our manuscript. We have now included the references<sup>5-11</sup> (ref. 32 – 38 in the revised main context) to the EP-based sensor in the revised manuscript to provide a more comprehensive context for our study.

### **Reviewer #2:**

### **Comment 0**

The noteworthy results from this work can be summarized as follows:

1. Proposed System: Introduction of an exceptional point (EP)-based biotelemetric system for continuous and real-time wireless intracranial pressure (ICP) monitoring using an iontronic capacitive pressure transducer.
2. Enhanced Performance: The system leverages EP degeneracy combined with a highly sensitive iontronic transducer, leading to significant improvements in reliability, resolution, and sensitivity.
3. Sensitivity: Achieved a maximum relative sensitivity of 115.95 kHz/mmHg, which is nearly an order of magnitude higher than current ICP sensing systems.

4. Accuracy: Capable of detecting pressure variations as small as one-thousandth of a millimeter of mercury, greatly surpassing the accuracy of commercial ICP sensors.
5. Validation: In-vivo experiments conducted on a rabbit model validated the practical efficacy of the system, showing its superior sensitivity compared to traditional ICP probes.
6. Multi-modal Detection: The system can accurately identify various degrees of pressure signals and perform multi-modal detection, including minute ICP fluctuations caused by physiological processes such as respiration and cardiac activity.
7. Comprehensive Monitoring: The system not only monitors ICP but also concurrently tracks respiratory and heart rates, simplifying clinical procedures and enhancing clinical utility by providing a comprehensive monitoring solution in a single device.
8. Healthcare Applications: The integration of this biotelemetry system into bio-implantation practices holds significant promise for healthcare applications, particularly in continuous monitoring of vital signs, potentially transforming patient care and monitoring practices.

Will the work be of significance to the field and related fields? How does it compare to the established literature? If the work is not original, please provide relevant references.

Yes, this work is likely to be significant to the field of biomedical engineering and related fields, particularly in the areas of biotelemetry, intracranial pressure (ICP) monitoring, and patient care technology. Here's how it compares to the established literature and its potential impact:

Significance to the Field:

#### 1. Advancement in ICP Monitoring:

**Higher Sensitivity and Accuracy:** The proposed system's maximum relative sensitivity of 115.95 kHz/mmHg and the ability to detect pressure variations as small as one-thousandth of a millimeter of mercury are notable advancements over existing ICP monitoring technologies. This could

significantly improve patient outcomes by enabling more precise and early detection of abnormal ICP levels.

**Wireless Biotelemetry:** The continuous and real-time wireless monitoring capability represents a substantial improvement in patient comfort and mobility compared to traditional wired systems.

## 2. Multi-modal Detection:

The ability to monitor not only ICP but also respiratory and cardiac activity in a single device simplifies clinical procedures and provides a more comprehensive picture of the patient's physiological state, which could be particularly valuable in intensive care settings.

## 3. Potential Healthcare Applications:

The integration of this system into bio-implantation practices could transform patient care by enabling continuous, real-time monitoring of vital signs, potentially reducing the need for invasive procedures and frequent hospital visits.

## Comparison to Established Literature:

### 1. Current Sensing Systems:

Traditional ICP monitoring systems, such as ventricular catheters and fiber optic transducers, typically have lower sensitivity and resolution compared to the proposed EP-based system. These systems often require invasive procedures and are less capable of detecting minute pressure fluctuations.

### 2. Wireless and Telemetric Systems:

While there have been advancements in wireless ICP monitoring, such as the use of telemetric sensors, these systems generally do not achieve the same level of sensitivity and resolution as reported in this work.

## Originality and Novelty:

The work appears to be original in its application of EP degeneracy with an iontronic capacitive pressure transducer for ICP monitoring, achieving unprecedented sensitivity and accuracy levels. The integration of multi-modal detection capabilities within a single wireless biotelemetric system also represents a novel advancement over current technologies.

#### Conclusion:

Given the enhancements in sensitivity, accuracy, and the added functionality of concurrent monitoring of respiratory and cardiac activity, this work has the potential to make a significant impact on the field of ICP monitoring and broader healthcare applications. It addresses several limitations of current technologies and introduces innovative solutions that could improve patient care and monitoring practices.

#### **Our response:**

We greatly appreciate the reviewer for your positive comments on our work.

#### **Comment 1**

Within the literature regarding ICP and ICC (intracerebral compliance) there are new advanced system that was not considered and compared with this data regarding the present manuscript. The authors should provide additional literature regarding ICP measurements using Brain4care system, particularly, the robust publications as following: <https://brain4.care/en/home-english/>

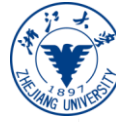

95

• Article | Characterization of intracranial compliance in healthy subjects using a noninvasive method - results from a multicenter prospective observational study

Gabriela Nagai Ocamoto, Lucas Normando da Silva, Camila da Silva Rocha Tomaz, Matheus Toshio Hisatugu, Gustavo Frigieri, Danilo Cardim, Roberta Lins Gonçalves, Thiago Luiz Russo, Robson Luis Oliveira de Amorim.  
DOI: <https://doi.org/10.1007/s10877-024-01191-w>

94

• Article | Effects of moderate sedation induced by propofol or midazolam on intracranial pressure

Bianca Drewnowski, José Carlos Rebuglio Velloso, Rafael Nastas Acras, Fábio André dos Santos.  
DOI: <https://doi.org/10.7322/abcchs.2022098.2164>

93

• Article | Methodology for non-invasive monitoring of intracranial pressure waves in dogs with traumatic brain injury using the brain4care® BCM/2000 monitor

Thyara Weizenmann, Mônica Vicky Bahr Arias.  
DOI: <https://doi.org/10.35172/rvz.2024.v31.1583>

92

• Article | A Comprehensive Perspective on Intracranial Pressure Monitoring and Individualized Management in Neurocritical Care: Results of a Survey with

Global Experts

Sérgio Brasil, Daniel Agustín Godoy, Walter Videtta, Andrés Mariano Rubiano, Davi Solla, Fabio Silvio Taccone, Chiara Robba, Frank Rasulo, Marcel Aries, Peter Smielewski, Geert Meyfroidt, Dinis Battaglini, Mohammad I. Hirzallah, Robson Amorim, Gisele Sampaio, Fabiano Moulin, Cristian Deana, Edoardo Piretti, Angelos Kolias, Peter Hutchinson, Gregory W. Hawryluk, Marek Czosnyka, Ronney B. Panerai, Lori A. Shutter, Soojin Park, Carla Ryniowski, Jorge Paranhos, Thiago H. S. Silva, Luz M. S. Malbousson and Wellington S. Paiva.  
DOI: <https://doi.org/10.1007/s12028-024-02008-z>

91

• Article | Noninvasive neuromonitoring in acute brain injured patients

Sérgio Brasil, Randall Chesnut, Chiara Robba.  
DOI: <https://doi.org/10.1007/s00134-024-07406-7>

90

• Article | A narrative review on financial challenges and healthcare costs associated with traumatic brain injury in the US

Wander Valentim, Sérgio Brasil, Raphael Bertani.  
DOI: <https://doi.org/10.1016/j.wneu.2024.03.175>

89

• Article | Non-Invasive Study of Intracranial Pressure in Pre- and Post-Chemotherapy Patients for the Treatment of Breast Neoplasia

Lais Daiane Cosmicki, Cristiane Ricci, Danielle Cristiane Kalva Borato,

Gustavo Henrique Frigieri, Nicolas Nunes Rabelo, Bruna França Bueno, José Carlos Rebuglio Velloso.

DOI: <https://www.portaobscuros.org.br/abcchs/article/view/1971>

88

• Case report | Management of shunt dysfunction using noninvasive intracranial pressure waveform monitoring. illustrative case

Raphael Bertani, Caio Perret, Stefan Koester, Paulo Santa Maria, Savio Batista, Sophia de Andrade Cavichiolli, Sany Tomomi de Almeida Rocha Arita, Roy Monteiro, Gianne Lucchesi, Fernando Augusto Vasconcellos, Matheus Miranda, Wellington Silva Paiva, Fernando Gomes Pinto.  
DOI: <https://pubmed.ncbi.nlm.nih.gov/38427677/>

87

• Article | Validation of a Non-invasive Method Using Mechanical Extensometer for the Estimation of Intracranial Compliance by Repeated Measures Agreement Analysis

Sanem Pinar Uysal, Hayley G. Williams, Mina Huerta, Nicolas R. Thompson, Catherine E. Hassett.  
DOI: <https://doi.org/10.21203/rs.3.rs-3848331/v1>

86

• Case report | Propofol effects over intracranial pressure waveform and cerebral hemodynamics: A case report

Nathalia Meneses Neves, Thais Rodrigues Kassahara, Sany Tomomi de Almeida Rocha Arita, Elaine Peixoto, Sérgio Brasil.

DOI: <https://doi.org/10.33446/ndc-v13i2.44982>

85

• Article | Age as a predictive factor for reduced intracranial compliance in patients with headache

Luz Gabriel Gonçalves Cherain, Mateus Gonçalves de Sena Barbosa, Gasparr Gomes de Oliveira Alves Francisco, Luiz Miguel Gonçalves Cherain, Gustavo Frigieri, Nicolas Nunes Rabelo.  
DOI: <https://doi.org/10.1007/s10877-023-01120-3>

84

• Article | ICP wave morphology as a screening test to exclude intracranial hypertension in brain-injured patients: a non-invasive perspective

Fabiano Moulin de Moraes, Sérgio Brasil, Gustavo Frigieri, Chiara Robba, Wellington Paiva e Gisele Sampaio Silva.  
DOI: <https://doi.org/10.1007/s10877-023-01120-3>

83

• Case report | Astrocytoma Mimicking Herpetic Meningoencephalitis: The Role of Non-Invasive Multimodal Monitoring in Neurointensivism

Uri Adrian Pynck Flato, Barbara Cristina de Abreu Pereira, Fernando Alvares Costa, Marcos Cairo Vilela, Gustavo Frigieri, Nilton José Fernandes Cavalcante, Samantha Longhi Simões de Almeida.  
DOI: <https://doi.org/10.3390/neuclint15040090>

82

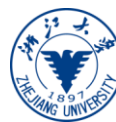

• Article | Epidemiological study of pediatric patients with signs and symptoms of intracranial hypertension with non-invasive cerebral compliance  
Luana Say, Caroline Mensor Falcini, Guilherme de Rosso Marcos, Marinel Campos Rieiro, Fábio de Araújo Motta, Adriano Keijiro Maeda, Simone Carreiro Vieira Karuta.  
DOI: <https://doi.org/10.33448/rsd-v12i0.43481>

81

• Letter | Neuromonitoring-Here, There, and to Every Critically Ill Patient  
Juliana Caldas, Sergio Brasil, Rogério Passos.  
DOI: [10.1097/CCM.00000000000005926](https://doi.org/10.1097/CCM.00000000000005926)

80

• Article | Intracranial pressure waveform in patients with essential hypertension  
Mathaus Martins da Costa, Ana Luiza Lima Sousa, Mikaelle Costa Correia, Sayuri Inuzuka, Thiago Oliveira Costa, Priscila Valverde O. Vitorino, Polyana Vulcano de Toledo Piza, Gustavo Frigieri, Antonio Coa, Weimar Kunz Sebba Barroso.  
DOI: <https://doi.org/10.3389/fcvm.2023.1288090>

79

• Article | Non-invasive intracranial pressure waveform analysis in Chiari Malformation type I: A pilot trial  
Eloy Rufaia Neto, Wellington Silva Paiva, Róger Schimidt Brock, Cintya Yúkie Hayashi, Marcia Mibe Nagumo, Mauricio Oriente Segurado, Ana Luiza

68

• Article | The use of noninvasive measurements of intracranial pressure in patients with traumatic brain injury: a narrative review  
Luiz Gustavo Guimarães Sacramento, André Vitor Rocha Queiroz, Fernanda de Andrade Dias Leite, Henrique Lacerda Lage Lopes de Oliveira, Thais Yuki Kimura, Rodrigo Moreira Faleiro. 2023. Arquivos de Neuro-Psiquiatria.  
DOI: <https://doi.org/10.1055/s-0043-1764111>

67

• Article | Intracranial compliance and volumetry in patients with traumatic brain injury  
Caroline Link, Thomas Markus D'Haese, Gustavo Frigieri, Jose Carlos Rebuglio Velloso, Leonardo Walling. 2023. Surgical Neurology International.  
DOI: [10.25259/SNI.314.2023](https://doi.org/10.25259/SNI.314.2023)

66

• Article | A Point-Of-Care Noninvasive Technique For Surrogate ICP Waveforms Application In Neurocritical Care  
Sérgio Brasil, Daniel A. Godoy and Gregory W. J. Hawryluk. 2023. Neurocritical Care.  
DOI: <https://doi.org/10.1007/s12028-023-01786-2>

65

• Letter | A new noninvasive method can effectively assess intracranial compliance  
Sérgio Brasil e Daniel Agustín Godoy. 2023. Acta Neurochirurgica.

Zaninotto, Rötson Luis Amorim.  
DOI: <https://doi.org/10.1016/j.wneu.2023.11.067>

78

• Article | The influence of hemodialysis on intracranial pressure waveform in patients with chronic kidney disease: an observational study  
Marilena Schechtel Koch, Bianca Drewnowski, Cristiane Rickli, Fábio André dos Santos, Gilberto Baroni, José Carlos Rebuglio Velloso.  
DOI: <https://doi.org/10.1590/1516-3180.2023.0068.R1.07072023>

77

• Article | Multimodal monitoring intracranial pressure by invasive and non-invasive means  
Fabiano Moulin de Moraes, Erica Navarro Borba Adosy, Eva Rocha, Felipe Chaves Duarte Barros, Fábio Geraldo Rezende Freitas, Maramella Miranda, Raul Alberto Valente, João Brainer Clares de Andrade, Feres Eduardo Aparecido Chaddad-Neto e Gisele Sampaio Silva.  
DOI: <https://doi.org/10.1038/s41598-023-45834-5>

76

• Article | Predicting short-term outcomes in brain-injured patients: A comprehensive approach with transcranial Doppler and intracranial compliance assessment  
Sergio Brasil, Danilo Cardim, Juliana Caldas, Chiara Robba, Fabio Silvio Taccone, Marcelo de-Lima-Oliveira, Márcia Harumi Yoshikawa, Luiz Marcelo Sá Malbousson, Wellington Silva Paiva.  
DOI: <https://doi.org/10.1007/s00701-023-05644-0>

64

• Article | Comparison of Noninvasive Measurements of Intracranial with Tap Test Results in Patients with Idiopathic Normal Pressure Hydrocephalus  
Gabriel André da Silva Mendes, Cintya Yúkie Hayashi, Gustavo Henrique Frigieri Vilela, Lissa Kido, Manoel Jacobsen Teixeira, Fernando Campos Gomes Pinto. 2023. Neuropsychiatric Disease and Treatment.  
DOI: <https://doi.org/10.2147/NDT.S402358>

63

• Case Report | Noninvasive intracranial pressure involving real-time waveform analysis in a child undergoing general anesthesia: a case report  
Gabriela Saba, Thais Condi, Vinicius Quintão, Gustavo Vilela, Ricardo Carlos, Maria Carmona. 2023. Perioperative Anesthesia Reports.  
DOI: <http://dx.doi.org/10.4322/pap.000223>

62

• Article | The intracranial compartment syndrome: a proposed model for acute brain injury monitoring and management  
Daniel Agustín Godoy, Sérgio Brasil, Conrado Iaccarino, Wellington Paiva, Andres M. Rubiano. 2023. Critical Care.  
DOI: [10.1186/s13054-023-04427-4](https://doi.org/10.1186/s13054-023-04427-4)

61

• Case Report | Noninvasive intracranial pressure monitoring throughout

DOI: <https://doi.org/10.21203/rs.3.rs-3406169/v1>

75

• Article | Intracranial pressure changes of cardiac patients that have passed by extracorporeal circulation: A brief literature review  
Lais Daiane Cosmiski, Bianca Drewnowski, Bruna França Bueno, Cristiane Rickli, Lisiane Cristine Lopes, Marilena Schechtel Koch, José Carlos Rebuglio Velloso.  
DOI: <http://dx.doi.org/10.33448/rsd-v11i15.37512>

74

• Editorial | An Unexpected Correlation Between Non-Invasive Intracranial Pressure Waveform Assessment in Hypertensive Patients: Could This Be the Link Between Hypertension and Cerebrovascular Diseases as Well as Cognitive Impairments?  
Luciano Brandão Machado, Michele Madeira Brandão, Andre Ferro, Tales Shinji Sawakuchi Minei, Igor José Nogueira Gualberto, Nivaldo Alonso.  
DOI: <https://doi.org/10.18103/mra.v11i7.24166>

73

• Experimental | Non-invasive monitoring of intracranial pressure waveforms using Brancare® BCMM 2000 monitor in dogs with myelopathies undergoing myelography  
Cardoso GS, Nogueira JF, Arias MVB.  
DOI: <https://doi.org/10.1590/1678-5150-PV6-7132>

brain compliance guiding a ventriculoperitoneal shunt replacement in hydrocephalus—case report  
Nélcí Zanon, Victor Hugo da Costa Beralia, Thiago Hoestler, Cintya Yúkie Hayashi, Gustavo Frigieri, Geselle Coelho. 2023. Child's Nervous System.  
DOI: [10.1007/s00381-023-05922-3](https://doi.org/10.1007/s00381-023-05922-3)

60

• Case report | A glimpse into multimodal neuromonitoring in acute liver failure: a case report  
Stefano Zorzi, Amanda Ayako Minemura Ordinola, Eduardo Cunha De Souza Lima, Gabriela Martins Teixeira, Michele Salvagno, Elda Diletta Sterchele, Fábio Silvio Taccone.  
DOI: <http://dx.doi.org/10.1097/MS9.0000000000001519>

59

• Article | Qualitative Evaluation of Intracranial Pressure Slopes in Patients Undergoing Brain Death Protocol  
Mylena Miki Lopes Ikeda, Louise Makarem Oliveira, Daniel Buzzaglo Gonçalves, Mylla Christie de Oliveira Paschoalino, Nise Alessandra de Carvalho Sousa, Marcus Vinicius Della Coletta, Wellington Paiva, Sérgio Brasil and Robson Luis Oliveira de Amorim.  
DOI: [10.3390/brains13030401](https://doi.org/10.3390/brains13030401)

58

• Letter | Application of non-invasive ICP waveform analysis in acute brain injury: Intracranial Compliance Scale

72

• Case report | Anesthesia for preoperative non-invasive intracranial pressure measurement in a child with Apert syndrome: a case report  
Luciano Brandão Machado, Michele Madeira Brandão, Andre Ferro, Tales Shinji Sawakuchi Minei, Igor José Nogueira Gualberto, Nivaldo Alonso.  
DOI: <https://doi.org/10.46900/apn.v5i3.130>

71

• Article | Comorbidities and the occurrence of changes in Intracranial Compliance in elderly  
Cristiane Rickli Barbosa, José Carlos Rebuglio Velloso, Lais Daiane Cosmiski, Marilena Schechtel Koch.  
DOI: <https://doi.org/10.53660/CLM-1842-23M51>

70

• Doing more with less on intracranial pressure monitoring  
Daniel A. Godoy, Wellington S. Paiva. 2023. World Neurosurgery.  
DOI: <https://doi.org/10.1016/j.wneu.2023.07.055>

69

• Article | Analysis of intracranial pressure waveform using a non-invasive method in individuals with craniostomosis  
Michele Madeira Brandão, Cristiano Tonello, Isabella Parizotto, Luciano Brandão Machado, Nivaldo Alonso. 2023. Child's Nervous System.  
DOI: <https://doi.org/10.1007/s00381-023-06092-y>

Gustavo Frigieri, Chiara Robba, Fábio Santana Machado, Joao A. Gomes and Sérgio Brasil. 27 January 2023 ( 27 Janeiro 2023)  
DOI: [10.1186/s40635-023-00492-9](https://doi.org/10.1186/s40635-023-00492-9)

57

• Article | Noninvasive intracranial pressure waveforms for estimation of intracranial hypertension and outcome prediction in acute brain injured patients  
Brasil, S, et al. 18 Nov. 2022.  
DOI: <https://doi.org/10.1007/s10877-022-00941-y>

56

• Article | Intracranial compliance in type 2 diabetes mellitus and its relationship with the cardiovascular autonomic nervous control  
G.A.M. Galdino, et al. Set. 2022  
DOI: <https://doi.org/10.1590/1414-431X2022e12150>

55

• Article | Assessment of Cerebral Autoregulation Using Invasive and Noninvasive Methods of Intracranial Pressure Monitoring  
Hassett, C.E., Uysal, S.P., Butler, R. et al. Set. 2022  
DOI: [doi.org/10.1007/s12028-022-01585-1](https://doi.org/10.1007/s12028-022-01585-1)

54

• Letter | Intracranial pressure pulse morphology: the missing link?  
Brasil, S. 29 Ago. 2022  
DOI: [doi.org/10.1007/s00134-022-06855-2](https://doi.org/10.1007/s00134-022-06855-2)



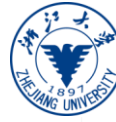

53

- Article | Noninvasive intracranial pressure in patients with traumatic brain injury  
Link C, Botelho AF, Dhasee TM, Frigieri G, Velloso JCR, Welling LC. 08 Ago 2022  
DOI: doi.org/10.33448/rsd-v11i10.33106

52

- Article | Mechanical Hyperinflation Maneuver and intracranial pressure of critical neurological patients: protocol for a randomized clinical trial  
Souza D, Branco MW, Camaró Júnior H, Zoccolotti AMD, Takeda SYM, Valderamas S. 13 Jul 2022  
Research Square  
Trials

51

- Article | Preliminary assessment of the relationship between blood pressure and intracranial pressure in patients with different stages of chronic kidney disease  
Balzer, E.R., Koch, M.S., Drewnowski, B., Santos, F.A. dos., Baroni, G., Schunski, A.F.M. and Velloso, J.C.R. Jun. 2022. DOI: doi.org/10.33448/rsd-v11i8.31150.

50

- Case Report | Alteration of intracranial compliance in a patient with chronic  
Methods?  
Rabelo, N. World neurosurgery.  
DOI: <https://doi.org/10.1016/j.wneu.2021.06.050>

36

- Article | Noninvasive intracranial pressure real-time waveform analysis monitor during prostatectomy robotic surgery and Trendelenburg position: case report  
Saba, G. Brazilian Journal of Anesthesiology.  
DOI: <https://doi.org/10.1016/j.bjane.2021.09.003>

35

- Case Report | Non-invasive intracranial pressure monitoring in idiopathic intracranial hypertension and lumbar puncture in pediatric patient: case report  
Dhasee, T. Surgical Neurology International. DOI: 10.25259/SN\_124\_2021

34

- Case Report | Effect of hemodialysis on cerebral compliance assessed in a non invasive way  
Ricky, C. Brazilian Journal of Development. DOI: doi.org/10.34117/bjdv.7n1-689

33

- Case Report | Elderly non invasive intracranial pressure monitoring: a report of waveform morphology and cerebral compliance

kidney disease and T1 diabetes mellitus

Koch, M.S., Drewnowski, B., Balzer, E.R., Baroni, G., Schunski, A.F.M. and Velloso, J.C.R. Jun. 2022. DOI: doi.org/10.33448/rsd-v11i8.31153.

49

- Article | Relationship Between Dialysis Quality And Brain Compliance In Patients With End-Stage Renal Disease  
Mascarenhas S, Rickli C, Frigieri GH, Velloso JCR, Schunski, AFM. May 2022. DOI: doi.org/10.1590/1516-3180.2021.0117.R1.14092021

48

- Case Report | Noninvasive Monitoring Of Intracranial Pressure After Cardiac Surgery  
Ayres, C., Velloso, J. C. R. 10 May, 2022. DOI: doi.org/10.33448/rsd-v11i6.29492

47

- Case Report | Use of non-invasive sensor to assess intracranial compliance in the management of migraine patients  
Cherain LGG, Barbosa MG5, Souza RLV et al. 22 April 2022 DOI: doi.org/10.21203/rs.3.rs-1162693/v2

46

- Article | Non-invasive monitoring of intracranial pressure in cardiovascular diseases  
Ayres, Claudiane. 2022. Collection: Applied biomedical engineering. DOI: doi.org/10.22533/at.ed.696220604

Velloso, J. Brazilian Journal of Development. DOI: doi.org/10.34117/bjdv.7n1-470

470

3

2

- Case report | Untreatable Headache in a Child with Ventriculoperitoneal Shunt Managed by Use of New Non-Invasive ICP Waveform: a Case Report  
Paraguassu, G. Frontiers in Neuroscience.  
DOI: <https://doi.org/10.3389/fnins.2021.601945>

31

- Chapter | Non-Invasive intracranial pressure monitoring  
Welling, L. LIVRO: Neurocritical Care for Neurosurgeons: Principles and Applications. DOI: <https://doi.org/10.1007/978-3-030-66572-2>

30

- Article | Noninvasive intracranial pressure monitoring in chronic Stroke patients with sedentary behavior -pilot study  
Ocamoto, G. Acta Neurochirurgica Supplement. DOI: doi.org/10.1007/978-3-030-59436-7\_12

29

- Letter | The Noninvasive Intracranial Pressure in Patients with Intracranial Hypertension  
Rabelo, N. Clinics in Surgery. DOI: [https://www.clinicsinjury.com/pdfs\\_folder/cis-v6-td3144.pdf](https://www.clinicsinjury.com/pdfs_folder/cis-v6-td3144.pdf)

45

- Article | Preliminary evaluation of a non-invasive device for monitoring intracranial pressure waveforms in dogs  
Bahr Arias MV, Conceição RT, Guimarães FC, Cardoso GS, Rocha NLF.C. J Small Anim Pract. 2022 Mar 4. DOI: doi.org/10.1111/jap.13460

44

- Article | Photonic Treatment and Fibromyalgia The Effect on Brain Compliance - Case Report  
Junior AEA, Carbinatto FM, Tomaz CSR, Bagnato VS (2022) J Nov Physiother 12: 510. DOI: doi.org/10.4172/2165-7025.1000510

43

- Article | Waveform Morphology as a Surrogate for ICP Monitoring: A Comparison Between an Invasive and a Noninvasive Method  
de Moraes FM, Rocha E, Barros FCD, Freitas FGR, Miranda M, Valiente RA, de Andrade JBC, Neto FEAC, Silva GS. 2022: 241-9. DOI: doi.org/10.1007/97812028-022-01477-4

42

- Article | From disease to noninvasive intracranial monitoring  
Folchini, Caroline Mensor et al. 2022: ISSN 1678-4227. DOI: doi.org/10.1590/0004-282X-ANP-2021-0298

41

28

- Case report | Non-invasive monitoring of intracranial pressure during midazolam-induced moderate sedation for upper gastro intestinal endoscopy  
Drewnoski, B. Brazilian Journal of Development.  
DOI: <https://doi.org/10.34117/bjdv.v7i5.29327>

27

- Letter | Neurosurgery and Manned Spaceflight  
Rabelo, N. Neurosurgery. DOI: doi.org/10.1093/neuros/nyab133

26

- Article | Intracranial pressure and laboratory parameters in high and low risk pregnant women  
Silveira, D. Surgical Neurology International. DOI: doi.org/10.25259/SN\_109\_2021

25

- Article | Noninvasive intracranial pressure monitoring methods: a critical review  
Moulin, F. 2021. Arquivos de Neuro Psiquiatria. DOI: doi.org/10.1590/0004-282X-ANP-2020-0300

24

- Article | Use of non-invasive intracranial pressure pulse waveform to monitor patients with End-Stage Renal Disease (ESRD)  
Ricky, C. PLOS ONE. DOI: doi.org/10.1371/journal.pone.0240570

- Article | Noninvasive intracranial pressure monitoring in women with migraine  
Rossi, D.M., Bevilacqua-Grossi, D., Mascarenhas, S. et al. 2022. Sci Rep 12, 2635. DOI: doi.org/10.1038/s41598-022-06258-9

40

- Article | A novel noninvasive technique for intracranial compliance monitoring in neurocritical care  
Brasil, S. Journal of Personalized Medicine. DOI: <https://doi.org/10.3390/jpm1121302>

39

- Article | The use of a non-invasive intracranial pressure monitoring method in the intensive care unit to improve neuroprotection on postoperative patients following extracorporeal circulation  
Salcomon, R. RBTI - Revista Brasileira de Terapia Intensiva. DOI: 10.5935/0103-507X.20210066

38

- Article | Intracranial Compliance Concepts and Assessment: A Scoping Review  
Ocamoto, G. Frontiers in Neurology. DOI: <https://doi.org/10.3389/fneur.2021.756112>

37

- Letter | Is It Possible To Monitor The Wave Form With Non-invasive

23

- Article | Comparison of waveforms between non-invasive and invasive ICP monitoring  
Gomes, I. Acta Neurochirurgica Supplement. DOI: doi.org/10.1007/978-3-030-59436-7\_28

22

- Article | Intracranial compliance assessed by intracranial pressure pulse waveform  
Brasil, S. Brainsciences. DOI: doi.org/10.3390/brainsci11080971span>

21

- Article | A nanometer resolution wireless device for non invasive intracranial pressure monitoring  
Andrade, R. IEEE Sensors Journal. DOI: doi.org/10.1109/ISEN.2021.3090648

20

- Article | Cerebral Hemodynamics And Intracranial Compliance Impairment In Critically Ill Covid-19 Patients: A Pilot Study  
Brasil, S. 2021. Brainsciences. DOI: doi.org/10.3390/brainsci11070874

19

- Article | The historic evolution of intracranial pressure and cerebrospinal fluid pulse pressure concepts: 2 centuries of challenges  
Rabelo, N. Surgical Neurology International. DOI: doi.org/10.25259/SN\_53\_2021

|                                                                                                                                                                                                                                                                                                                                                                                                                                                                                                                                                                                                                                                                                                                                                                                                                                                                                                                                                                                                                                                                                                                                                                                                               |                                                                                                                                                                                                                                                                                                                                                                                                                                                                                                                                                                                                                                                                                                                                                                                                                                                                                                                                                                                                                                                                                                                                                                                                    |                                                                                                                                                                                                                                                                                                                                                                                                                                                                                                                                                                                                                                                                                                                                                                                                                                                                                                                                                                                                                                                                                                                                                                                                                                                                                                                                                                                                                                                                                                                                                                                                                                                                                                                                                                                                                                                                                                                                                                                                                                                                                                                                                                                                                                                                                                                                                                                                                                                                                                                                                                                                                                                                                                                                                                         |
|---------------------------------------------------------------------------------------------------------------------------------------------------------------------------------------------------------------------------------------------------------------------------------------------------------------------------------------------------------------------------------------------------------------------------------------------------------------------------------------------------------------------------------------------------------------------------------------------------------------------------------------------------------------------------------------------------------------------------------------------------------------------------------------------------------------------------------------------------------------------------------------------------------------------------------------------------------------------------------------------------------------------------------------------------------------------------------------------------------------------------------------------------------------------------------------------------------------|----------------------------------------------------------------------------------------------------------------------------------------------------------------------------------------------------------------------------------------------------------------------------------------------------------------------------------------------------------------------------------------------------------------------------------------------------------------------------------------------------------------------------------------------------------------------------------------------------------------------------------------------------------------------------------------------------------------------------------------------------------------------------------------------------------------------------------------------------------------------------------------------------------------------------------------------------------------------------------------------------------------------------------------------------------------------------------------------------------------------------------------------------------------------------------------------------|-------------------------------------------------------------------------------------------------------------------------------------------------------------------------------------------------------------------------------------------------------------------------------------------------------------------------------------------------------------------------------------------------------------------------------------------------------------------------------------------------------------------------------------------------------------------------------------------------------------------------------------------------------------------------------------------------------------------------------------------------------------------------------------------------------------------------------------------------------------------------------------------------------------------------------------------------------------------------------------------------------------------------------------------------------------------------------------------------------------------------------------------------------------------------------------------------------------------------------------------------------------------------------------------------------------------------------------------------------------------------------------------------------------------------------------------------------------------------------------------------------------------------------------------------------------------------------------------------------------------------------------------------------------------------------------------------------------------------------------------------------------------------------------------------------------------------------------------------------------------------------------------------------------------------------------------------------------------------------------------------------------------------------------------------------------------------------------------------------------------------------------------------------------------------------------------------------------------------------------------------------------------------------------------------------------------------------------------------------------------------------------------------------------------------------------------------------------------------------------------------------------------------------------------------------------------------------------------------------------------------------------------------------------------------------------------------------------------------------------------------------------------------|
| <p>18</p> <ul style="list-style-type: none"> <li>• Article   Obesity and its implications on cerebral circulation and intracranial compliance in severe covid 19<br/>Brasil, S. 2021. <i>Obesity Science &amp; Practice</i>. DOI: doi.org/10.1002/osp4.534</li> </ul> <p>17</p> <ul style="list-style-type: none"> <li>• Article   Intracranial Pressure During the Development of Renovascular Hypertension<br/>Fernandes, Hypertension DOI: doi.org/10.1161/HYPERTENSIONAHA.120.16217</li> </ul> <p>16</p> <ul style="list-style-type: none"> <li>• Chapter   Intracranial pressure waveform: History, fundamentals and applications in brain injuries<br/>Frigieri, G. LIVRO IntechOpen: Advancement and New Understanding in Brain Injury, DOI: doi.org/10.5772/intechopen.94077</li> </ul> <p>15</p> <ul style="list-style-type: none"> <li>• Chapter   Management of patients with brain injury using noninvasive methods<br/>Frigieri, G. LIVRO IntechOpen: Advancement and New Understanding in Brain Injury, DOI: doi.org/10.5772/intechopen.94143</li> </ul> <p>14</p> <ul style="list-style-type: none"> <li>• Letter   Use of Intracranial Pressure Monitoring in Patients with Severe</li> </ul> | <p>Traumatic Brain Injury</p> <p>Rabelo, N. <i>World Neurosurgery</i>. DOI: doi.org/10.1016/j.wneu.2020.07.222</p> <p>13</p> <ul style="list-style-type: none"> <li>• Letter   Intracranial pressure monitoring: Challenge beyond the threshold numerical value<br/>Rabelo, N. <i>Journal of Neurosurgery</i>. DOI: doi.org/10.3171/2020.9.JNS203395</li> </ul> <p>12</p> <ul style="list-style-type: none"> <li>• Article   Use of the Kirkpatrick methodology for training in new non-invasive intracranial pressure monitoring technology for nurses<br/>Barros, T. <i>Brazilian Journal of Health Review</i>. DOI: doi.org/10.34119/bjhr.v3i3-098</li> </ul> <p>11</p> <ul style="list-style-type: none"> <li>• Article   Intracranial compliance concepts and assessment: a scoping review protocol<br/>Russo, T. <i>Research Square</i>. DOI: doi.org/10.21203/rs.3.rs-43616/v1</li> </ul> <p>10</p> <ul style="list-style-type: none"> <li>• Article   In-flight analysis of intracranial pressure in pilots undergoing variation in Gz<br/>Bezerra, T. <i>Aeronautics and Aerospace Open Access Journal</i>. 2018;2(3):126-131. DOI: doi: 10.15406/aaaj.2018.02.00042</li> </ul> <p>09</p> | <ul style="list-style-type: none"> <li>• Article   Analysis of a minimally invasive intracranial pressure signals during infusion at the subarachnoid spinal space of pigs<br/>Frigieri, G. <i>Acta Neurochirurgica Supplement</i>. 2018;126:75-77. DOI: doi: 10.1007/978-3-319-65798-1_16</li> </ul> <p>08</p> <ul style="list-style-type: none"> <li>• Article   Analysis of a non-invasive intracranial pressure monitoring method in patients with traumatic brain injury<br/>Frigieri, G. <i>Acta Neurochirurgica Supplement</i>. 2018;126:107-110. DOI: doi: 10.1007/978-3-319-65798-1_23</li> </ul> <p>07</p> <ul style="list-style-type: none"> <li>• Article   Noninvasive intracranial pressure monitoring for HIV-associated cryptococcal meningitis<br/>Bolella, V. <i>Brazilian Journal of Medical and Biological Research</i>. 2017 Aug 7;50(9):e6392. DOI: doi: 10.1590/1414-431X20176392</li> </ul> <p>06</p> <ul style="list-style-type: none"> <li>• Article   Prediction of intracranial hypertension through noninvasive intracranial pressure waveform analysis in pediatric hydrocephalus<br/>Ballesterio, M. <i>Child's Nervous System</i>. 2017 Sep;33(9):1517-1524. DOI: doi: 10.1007/s00381-017-3475-1. Epub 2017 Jun 16</li> </ul> <p>05</p> <ul style="list-style-type: none"> <li>• Article   Characterization of ICP behavior in an experimental model of hemorrhagic stroke in rats<br/>Cardim, D. <i>Acta Neurochirurgica Supplement</i>. 2016;122:121-4. DOI: doi: 10.1007/978-3-319-22533-3_24</li> </ul> <p>04</p> <ul style="list-style-type: none"> <li>• Article   Characterization of intracranial pressure behavior in chronic epileptic animals: a preliminary study<br/>Cardim, D. <i>Acta Neurochirurgica Supplement</i>. 2016; 122:329-333. DOI: doi: 10.1007/978-3-319-22533-3_65</li> </ul> <p>03</p> <ul style="list-style-type: none"> <li>• Article   Validation of a new minimally invasive intracranial pressure monitoring method by direct comparison with an invasive technique<br/>Frigieri, G. <i>Acta Neurochirurgica Supplement</i>. 2016;122:97-100. DOI: doi: 10.1007/978-3-319-22533-3_19</li> </ul> <p>02</p> <ul style="list-style-type: none"> <li>• Article   Validation of a new noninvasive intracranial pressure monitoring method by direct comparison with an invasive technique<br/>Cabella, B. <i>Acta Neurochirurgica Supplement</i>. 2015;122:93-6. DOI: doi: 10.1007/978-3-319-22533-3_18</li> </ul> <p>01</p> <ul style="list-style-type: none"> <li>• Article   The new ICP minimally invasive method shows that the mono-kelie doctrine is not valid.<br/>Mascarenhas, S. <i>Acta Neurochirurgica Supplementum</i>. 2012; 117 – 120. DOI: doi.org/10.1007/978-3-7091-0956-4_21</li> </ul> |
|---------------------------------------------------------------------------------------------------------------------------------------------------------------------------------------------------------------------------------------------------------------------------------------------------------------------------------------------------------------------------------------------------------------------------------------------------------------------------------------------------------------------------------------------------------------------------------------------------------------------------------------------------------------------------------------------------------------------------------------------------------------------------------------------------------------------------------------------------------------------------------------------------------------------------------------------------------------------------------------------------------------------------------------------------------------------------------------------------------------------------------------------------------------------------------------------------------------|----------------------------------------------------------------------------------------------------------------------------------------------------------------------------------------------------------------------------------------------------------------------------------------------------------------------------------------------------------------------------------------------------------------------------------------------------------------------------------------------------------------------------------------------------------------------------------------------------------------------------------------------------------------------------------------------------------------------------------------------------------------------------------------------------------------------------------------------------------------------------------------------------------------------------------------------------------------------------------------------------------------------------------------------------------------------------------------------------------------------------------------------------------------------------------------------------|-------------------------------------------------------------------------------------------------------------------------------------------------------------------------------------------------------------------------------------------------------------------------------------------------------------------------------------------------------------------------------------------------------------------------------------------------------------------------------------------------------------------------------------------------------------------------------------------------------------------------------------------------------------------------------------------------------------------------------------------------------------------------------------------------------------------------------------------------------------------------------------------------------------------------------------------------------------------------------------------------------------------------------------------------------------------------------------------------------------------------------------------------------------------------------------------------------------------------------------------------------------------------------------------------------------------------------------------------------------------------------------------------------------------------------------------------------------------------------------------------------------------------------------------------------------------------------------------------------------------------------------------------------------------------------------------------------------------------------------------------------------------------------------------------------------------------------------------------------------------------------------------------------------------------------------------------------------------------------------------------------------------------------------------------------------------------------------------------------------------------------------------------------------------------------------------------------------------------------------------------------------------------------------------------------------------------------------------------------------------------------------------------------------------------------------------------------------------------------------------------------------------------------------------------------------------------------------------------------------------------------------------------------------------------------------------------------------------------------------------------------------------------|

## Our response:

We thank the reviewer for bringing these valuable references to our attention.

We recognize the importance of including comprehensive and current references to accurately reflect the state of research in this field. In response to your suggestion, we have reviewed the recent literature on ICP measurements using the Brain4care system. We have incorporated several publications<sup>12–17</sup> (ref. 8 – 13 in the revised main context) into the revised manuscript for comparison.

## REFERENCE

1. Loughlin, H. & Sudhir, V. Exceptional-Point Sensors Offer No Fundamental Signal-to-Noise Ratio Enhancement. *Phys. Rev. Lett.* **132**, 243601 (2024).
2. Xiao, Z., Li, H., Kottos, T. & Alù, A. Enhanced Sensing and Nondegraded Thermal Noise Performance Based on PT-Symmetric Electronic Circuits with a Sixth-Order Exceptional Point. *Phys. Rev. Lett.* **123**, 213901 (2019).
3. Nyquist, B. H. Thermal agitation of electric charge in conductors. *Phys. Rev.* **32**, 110 (1928).

4. Chen, P.-Y. *et al.* Generalized parity–time symmetry condition for enhanced sensor telemetry. *Nat. Electron.* **1**, 297–304 (2018).
5. Dong, Z., Li, Z., Yang, F., Qiu, C. W. & Ho, J. S. Sensitive readout of implantable microsensors using a wireless system locked to an exceptional point. *Nat. Electron.* **2**, 335–342 (2019).
6. Zeng, C. *et al.* Enhanced sensitivity at high-order exceptional points in a passive wireless sensing system. *Opt. Express* **27**, 27562 (2019).
7. Lee, H. *et al.* Chiral exceptional point and coherent suppression of backscattering in silicon microring with low loss Mie scatterer. *eLight* **3**, 20 (2023).
8. Kim, C. *et al.* Parity-time symmetry enabled ultra-efficient nonlinear optical signal processing. *eLight* **4**, 6 (2024).
9. Kononchuk, R., Cai, J., Ellis, F., Thevamaran, R. & Kottos, T. Exceptional-point-based accelerometers with enhanced signal-to-noise ratio. *Nature* **607**, 697–702 (2022).
10. Chen, W., Özdemir, Ş. K., Zhao, G., Wiersig, J. & Yang, L. Exceptional points enhance sensing in an optical microcavity. *Nature* **548**, 192–195 (2017).
11. Hodaei, H. *et al.* Enhanced sensitivity at higher-order exceptional points. *Nature* **548**, 187–191 (2017).
12. Dixon, B. *et al.* Assessment of a Non-Invasive Brain Pulse Monitor to Measure Intra-Cranial Pressure Following Acute Brain Injury. *Med. Devices Evid. Res.* **16**, 15–26 (2023).
13. Ocamoto, G. N. *et al.* Characterization of intracranial compliance in healthy subjects using a noninvasive method - results from a multicenter prospective observational study. *J. Clin. Monit. Comput.* 1-13 (2024).
14. Hassett, C. E. *et al.* Assessment of Cerebral Autoregulation Using Invasive and Noninvasive Methods of Intracranial Pressure Monitoring. *Neurocrit. Care* **38**, 591–599 (2023).
15. Aspide, R., Moneti, M. & Castioni, C. A. Are Intracranial Pressure Waveforms the New Frontier for Noninvasive Assessment of Intracranial Pressure? *Neurocrit. Care* **40** 48–50 (2024).
16. Ballestero, M. *et al.* Can a new noninvasive method for assessment of intracranial pressure predict intracranial hypertension and prognosis? *Acta Neurochir.* **165**, 1495–1503 (2023).
17. Brasil, S. *et al.* A novel noninvasive technique for intracranial pressure waveform monitoring in critical care. *J. Pers. Med.* **11**, 1302 (2021).
